1     **Sex-specific stress-related behavioral phenotypes and central amygdala dysfunction in a**  
2                                   **mouse model of 16p11.2 microdeletion**

3                                   Jacqueline Giovanniello<sup>1,2,3</sup>, Sandra Ahrens<sup>2,4</sup>, Kai Yu<sup>2</sup>, Bo Li<sup>1,2</sup>#

- 4     1. School of Biological Sciences, Cold Spring Harbor Laboratory, Cold Spring Harbor, NY  
5         11724, USA  
6     2. Cold Spring Harbor Laboratory, Cold Spring Harbor, NY 11724, USA  
7     3. Current address: Department of Psychology, University of California, Los Angeles, Los  
8         Angeles, CA, 90095 USA  
9     4. Current address: Laboratory of Behavioral Genetics, Brain Mind Institute, École  
10         Polytechnique Fédérale de Lausanne, 1015 Lausanne, Switzerland

11

12   # Correspondence: [bli@cshl.edu](mailto:bli@cshl.edu) (B.L.)

13

14

## 15 **Abstract**

16 Substantial evidence indicates that a microdeletion on human chromosome 16p11.2 is linked to  
17 neurodevelopmental disorders including autism spectrum disorders (ASD). Carriers of this  
18 deletion show divergent symptoms besides the core features of ASD, such as anxiety and  
19 emotional symptoms. The neural mechanisms underlying these symptoms are poorly understood.  
20 Here we report mice heterozygous for a deletion allele of the genomic region corresponding to  
21 the human 16p11.2 microdeletion locus (i.e., the ‘*16p11.2 del/+* mice’) have sex-specific  
22 anxiety-related behavioral and neural circuit changes. We found that female, but not male  
23 *16p11.2 del/+* mice showed enhanced fear generalization – a hallmark of anxiety disorders –  
24 after auditory fear conditioning, and displayed increased anxiety-like behaviors after physical  
25 restraint stress. Notably, such sex-specific behavioral changes were paralleled by an increase in  
26 activity in central amygdala neurons projecting to the globus pallidus in female, but not male  
27 *16p11.2 del/+* mice. Together, these results reveal female-specific anxiety phenotypes related to  
28 16p11.2 microdeletion syndrome and a potential underlying neural circuit mechanism. Our study  
29 therefore identifies previously underappreciated sex-specific behavioral and neural changes in a  
30 genetic model of 16p11.2 microdeletion syndrome, and highlights the importance of  
31 investigating female-specific aspects of this syndrome for targeted treatment strategies.

32

## 33 **Introduction**

34 As of 2018, the Autism and Developmental Disabilities Monitoring (ADDM) Network of the  
35 Center for Disease Control (CDC) estimated that approximately one in 59 children age eight and  
36 younger are currently diagnosed with autism spectrum disorders (ASD) (Baio et al., 2018). ASD  
37 is a spectrum of neurodevelopmental conditions defined by two major diagnostic criteria:

38 “persistent deficits in social communication and social interaction across multiple contexts” and  
39 “restricted, repetitive patterns of behavior, interests, or activities” (*Diagnostic and Statistical*  
40 *Manual of Mental Disorders, DSM-5*, 2013). Diagnoses of ASD often include supplemental  
41 association with intellectual disability, catatonia, other defined neurodevelopmental, mental,  
42 behavioral disorders, and/or a known medical, genetic, or environmental factor. Furthermore,  
43 patients with ASD are commonly diagnosed with one or more comorbid conditions including  
44 intellectual disability (Howlin, 2000; Schwartz & Neri, 2012; Tonnsen et al., 2016), attention  
45 deficit-hyperactivity disorder (Antshel et al., 2014, 2016; Antshel & Russo, 2019; Jang et al.,  
46 2013), obsessive compulsive disorder (Leyfer et al., 2006; Postorino et al., 2017), anxiety  
47 (Brookman-Fraze et al., 2018; Gotham et al., 2013; White et al., 2009), and depression  
48 (Andersen et al., 2015; Davidsson et al., 2017; Gotham et al., 2013; Matson & Cervantes, 2014),  
49 and are at increased risk for suicidality, particularly among females (T Hirvikoski et al., 2019;  
50 Tatja Hirvikoski et al., 2016; Kirby et al., 2019).

51  
52 Despite the heterogeneity in ASD features, one major consistency is its sex bias in diagnoses. It  
53 is well documented that ASD is about 4 times more common in males than in females with an  
54 exception for x-linked syndromes, such as Rett Syndrome which is more common in females  
55 (Fombonne, 2002). There is significant evidence of divergence among core symptoms of ASD  
56 based on sex. Specifically, many studies have found reduced severity of repetitive and or  
57 stereotyped behaviors in females than in males (Baron-Cohen, 2009; Beggiato et al., 2017;  
58 Knickmeyer et al., 2008; Kopp et al., 2010; Szatmari et al., 2012). In contrast, females show  
59 different social impairments compared with males (Beggiato et al., 2017; Dean et al., 2017; Head  
60 et al., 2014; Hiller et al., 2014; Werling & Geschwind, 2013). These tend toward more

61 internalizing symptoms and emotional disturbance (Horiuchi et al., 2014; Kreiser & White,  
62 2014; Rynkiewicz et al., 2016; Rynkiewicz & Łucka, 2018; Solomon et al., 2012). Females with  
63 ASD also show increased risk of eating disorders (Kalyva, 2009), sensory impairments (Lai et  
64 al., 2014), sleep disturbances (Hartley & Sikora, 2009), epilepsy and learning disorders (Giarelli  
65 et al., 2010). It has been suggested that females may “camouflage” their autism phenotypes  
66 better than males owing to fewer social impairments and better executive functioning (Bölte et  
67 al., 2011), as well as reduced externalizing symptoms (Werling & Geschwind, 2013). One way  
68 that emotional phenotypes often manifest, is as anxiety disorders. In the general population,  
69 females have an increased prevalence of stress-related disorders such as anxiety, depression, and  
70 PTSD (Breslau, 2002; Kessler et al., 1995; Olf, 2017; Tolin & Foa, 2006). Therefore, it is  
71 possible that anxiety-like phenotypes may present differently in males and females with ASD.

72  
73 A major limitation of much of the research in ASD has been its emphasis on males. This is not  
74 exclusive to ASD research as most research is done in males (Hughes, 2007). Among  
75 neuroscience studies in general, the sex bias of human subjects is approximately 5.5 males for  
76 every female and with a ratio much higher among animal studies (Beery & Zucker, 2011). This  
77 bias precludes our understanding of autism in females and limits our development of effective  
78 treatment strategies. Therefore, we sought to examine whether sex differences exist in stress-  
79 related behaviors in a mouse model of ASD. To this end, we utilized a model that mimics  
80 a microdeletion on human chromosome 16p11.2. Notably, this deletion is one of the most  
81 common genetic variations found in ASD, accounting for ~1% of ASD cases (Chen et al., 2017;  
82 Kumar et al., 2007; Marshall et al., 2008; Sanders et al., 2011; Sebat et al., 2007; Weiss et al.,  
83 2008). Patients with this deletion show repetitive behaviors, hyperactivity, intellectual disability,

84 motor and speech/language delay, and anxiety symptoms (Al-Kateb et al., 2014; Bijlsma et al.,  
85 2009; Fernandez et al., 2010; Shinawi et al., 2010; Steinman et al., 2016). Of note, individuals  
86 carrying the 16p11.2 deletion, including those non-ASD carriers, are often diagnosed as having  
87 anxiety disorders or other mood disorders (Zufferey et al., 2012).

88

89 The mouse model we used was generated by Horev et al. (Horev et al., 2011), and is one of three  
90 independently generated mouse genetic models that mimic the 16p11.2 microdeletion (Arbogast  
91 et al., 2016; Horev et al., 2011; Portmann et al., 2014). These models, which were created by  
92 deleting largely similar genomic intervals in mouse chromosome 7 corresponding to the syntenic  
93 16p11.2 microdeletion region in humans, exhibit overlapping phenotypes (Arbogast et al., 2016;  
94 Horev et al., 2011; Portmann et al., 2014). In particular, heterozygous deletion mice – hereafter  
95 referred to as *16p11.2 del/+* mice – in each of these lines share basic phenotypes such as low  
96 body weight and perinatal mortality, and, importantly, also show behavioral phenotypes related  
97 to the symptoms of human 16p11.2 microdeletion carriers. These phenotypes include increased  
98 locomotor activity, stereotyped and repetitive behaviors, sleep deficits, recognition memory  
99 deficits, reward learning deficits, and social deficits (Angelakos et al., 2017; Arbogast et al.,  
100 2016; Grissom et al., 2017; Horev et al., 2011; Portmann et al., 2014; Rein & Yan, 2020; Walsh  
101 et al., 2018; Yang, Lewis, et al., 2015; Yang, Mahrt, et al., 2015).

102

103 A few studies examined the *16p11.2 del/+* mice for anxiety or fear-related behaviors, but with  
104 mixed results. When tested in the open field (OPF) test and elevated plus maze (EPM) test,  
105 assays conventionally used to assess ‘anxiety’ in rodents, these mice appear not different from  
106 wildtype (WT) mice (Arbogast et al., 2016; Lynch et al., 2020; Yang, Lewis, et al., 2015),

107 (however, see (Pucilowska et al., 2015)). The *16p11.2 del/+* mice were also examined in fear  
108 conditioning paradigms. One study shows that the *16p11.2 del/+* mice have impaired contextual  
109 fear conditioning (Tian et al., 2015), whereas other studies show that the *16p11.2 del/+* mice  
110 have normal contextual fear conditioning and normal visually cued fear conditioning (Lynch et  
111 al., 2020; Yang, Lewis, et al., 2015).

112  
113 Recent studies indicate that environmental factors can exacerbate ASD symptomatology and  
114 impairments in cognitive and adaptive behaviors in *16p11.2* deletion carriers (Hudac et al.,  
115 2020), and *16p11.2 del/+* mice show altered coping in response to stress compared with wildtype  
116 littermates (Panzini et al., 2017; Yang, Lewis, et al., 2015). In light of these findings and studies  
117 showing males and females can exhibit very different behavioral responses to threats or stress  
118 (Dalla & Shors, 2009; Gruene et al., 2015), we reasoned that under a stressful situation *16p11.2*  
119 *del/+* mice may exhibit sex-specific behavioral changes. However, a potential sex-specific effect  
120 of the *16p11.2* deletion on anxiety or fear-related behaviors in mice has not been considered until  
121 recently (Lynch et al., 2020). Furthermore, only simple assays, such as OPF and EPM tests, have  
122 been used to assess “baseline anxiety” in *16p11.2 del/+* mice, which may not be sufficient to  
123 reveal potential changes in anxiety or fear processing in response to stress in these mice.

124  
125 To address these issues, in the current study we examined anxiety-related behaviors under  
126 different stress conditions in both male and female *16p11.2 del/+* mice and their wild type  
127 littermates. We found that female, but not male *16p11.2 del/+* mice showed enhanced fear  
128 generalization, a hallmark of anxiety disorders (Dunsmoor & Paz, 2015), after auditory fear  
129 conditioning. Furthermore, although at baseline *16p11.2 del/+* mice were not different from

130 their wildtype littermates in the EPM test, consistent with previous studies (Arbogast et al., 2016;  
131 Lynch et al., 2020; Yang, Lewis, et al., 2015), we found that female, but not male *16p11.2 del/+*  
132 mice showed enhanced anxiety in the EPM after acute restraint stress. Lastly, we found that  
133 these sex-specific behavioral changes were paralleled by an increase in activity in the central  
134 amygdala – a major limbic structure that regulates anxiety in rodents and primates (Ahrens et al.,  
135 2018; Fox et al., 2012; Shackman & Fox, 2016) – of female, but not male *16p11.2 del/+* mice.  
136 Together, our work suggests that *16p11.2* microdeletion differentially affects males and females  
137 and may disproportionately disrupt stress-regulation brain functions in females. These findings  
138 provide insight into understanding how ASD may present differently in females at behavioral  
139 and neuronal levels, and raise the question of whether changes to treatment and diagnostic  
140 strategies based on sex should be considered.

141

## 142 **Methods**

### 143 **Animals**

144 To breed *16p11.2 del/+* mice, we used *16p11.2 del/+* male mice (Stock Number: 013128) and  
145 C57/B6 female mice purchased from the Jackson Laboratory, or similar breeders obtained from  
146 Pavel Osten's lab at Cold Spring Harbor Laboratory (CSHL). Breeders were housed with a  
147 cardboard bio-hut under a 12-hour light/dark cycle (7 am to 7 pm light) with food and water  
148 available *ad libitum*. As *16p11.2 del/+* mice exhibit postnatal lethality (Horev et al., 2011), in  
149 breeding cages only, standard rodent chow (LabDiet) was supplemented with DietGel® Boost  
150 (ClearH2O), a high calorie liquid diet that increased survival of *16p11.2 del/+* pups. Pups were  
151 weaned at 3 weeks of age and group housed with wildtype littermates. Mice were genotyped for  
152 *16p11.2* microdeletion between 4-8 weeks of age with primers provided by Alea Mills' lab at

153 CSHL.

154

155 Mice of 2-4 months old were used for all behavioral experiments. Mice of 6-10 weeks old were  
156 used for all electrophysiology experiments. All experimental mice were housed under a 12-h  
157 light/dark cycle (7 a.m. to 7 p.m. light) in groups of 2-5 animals, containing both *16p11.2 del/+*  
158 mice and their wildtype littermates. Food and water were available *ad libitum*. All behavioral  
159 experiments were performed during the light cycle. Littermates were randomly assigned to  
160 different groups prior to experiments. All experimental procedures were approved by the  
161 Institutional Animal Care and Use Committee of CSHL and performed in accordance to the US  
162 National Institutes of Health guidelines.

163

#### 164 **Behavioral tasks**

##### 165 *Auditory fear conditioning*

166 We followed standard procedures for classical auditory fear conditioning (Li et al., 2013; Penzo  
167 et al., 2014, 2015; Yu et al., 2017). Briefly, mice were initially handled and habituated to a  
168 conditioning cage, which was a Mouse Test Cage (18 cm x 18 cm x 30 cm) with an electrifiable  
169 floor connected to a H13-15 shock generator (Coulbourn Instruments, Whitehall, PA). The Test  
170 Cage was placed inside a sound attenuated cabinet (H10-24A; Coulbourn Instruments). Before  
171 each habituation and conditioning session, the Test Cage was wiped with 70% ethanol. The  
172 cabinet was illuminated with white light during habituation and conditioning sessions.

173

174 During habituation, two 4-kHz 75-dB tones and two 12-kHz 75-dB tones, each of which was 30s  
175 in duration, were delivered at variable intervals within an 8-minute session. During conditioning,



176 mice received three presentations of the 4-kHz tone (conditioned stimulus; CS+), each of which  
177 co-terminated with a 2-s 0.7-mA foot shock (unless otherwise stated), and three presentations of  
178 the 12-kHz tone (CS-), which were not paired with foot shocks. The CS+ and CS- were  
179 interleaved pseudo-randomly, with variable intervals between 30 and 90 s within a 10-minute  
180 session. The test for fear memory (retrieval) was performed 24 h following conditioning in a  
181 novel context, where mice were exposed to two presentations of CS+ and two presentations of  
182 CS- (>120 s inter-CS interval). The novel context was a cage with a different shape (22 cm x 22  
183 cm x 21 cm) and floor texture compared with the conditioning cage, and was illuminated with  
184 infrared light. Prior to each use the floor and walls of the cage were wiped clean with 0.5% acetic  
185 acid to make the scent distinct from that of the conditioning cage.

186

187 Animal behavior was videotaped with a monochrome CCD-camera (Panasonic WV-BP334) at  
188 3.7 Hz and stored on a personal computer. The FreezeFrame software (Coulbourn Instruments)  
189 was used to control the delivery of both tones and foot shocks. Freezing behavior was analyzed  
190 with FreezeFrame software (Coulbourn Instruments). Baseline freezing levels were calculated as  
191 the average freezing during the first 100 s of the session before any stimuli were presented, and  
192 freezing to the auditory stimuli was calculated as the average freezing during the tone  
193 presentation. The average of the freezing responses to two CS+ or CS- presentations during  
194 retrieval was used as an index of fear. Discrimination Index was calculated as the difference  
195 between freezing to the CS+ and CS-, normalized by the sum of freezing to both tones.

196

197 *Shock sensitivity test*

198 Animals were placed in a conditioning Test Cage in a lit, sound attenuated box, as in the fear

199 conditioning experiments, and received two presentations each of 0.2, 0.4, 0.6, 0.8, and 1.0 mA  
200 shocks with an inter-shock interval of 30 seconds. Animals were monitored with a monochrome  
201 CCD camera (Panasonic WV-BP334) at 4 Hz, and tracked and analyzed using Ethovision XT 5.1  
202 (Noldus Information Technologies) to extract distance traveled and movement velocity during  
203 the 2s time window of each shock presentation.

204

### 205 *Acute physical restraint stress*

206 For stress susceptibility experiments, animals underwent a standard protocol of acute physical  
207 restraint as described previously (K. Kim & Han, 2006). Mice were immobilized in a well-  
208 ventilated 50 mL conical tube for two hours in a dark, sound attenuated chamber. Males and  
209 females were kept in separate chambers. Animals were then tested on the EPM 24 hours after the  
210 end of the restraint session.

211

### 212 *Elevated plus maze test*

213 The elevated plus maze (EPM) test apparatus was constructed from white Plexiglas and  
214 consisted of two open arms without walls (30 cm long and 5 cm wide) and two arms enclosed by  
215 15.25 cm high non-transparent walls. The arms were extended from a central platform (5 cm x 5  
216 cm), and were arranged such that the identical arms were opposite to each other. The maze was  
217 raised to a height of 50 cm above the floor with an overhead light. At the start of the session,  
218 animals were placed in the center zone and allowed to explore the maze for 10 minutes in the  
219 absence of the experimenter, while their behavior was videotaped using a monochrome CCD  
220 camera (Panasonic WV-BP334) at 4 Hz. The resulting data was analyzed using Ethovision XT  
221 5.1 (Noldus Information Technologies). Parameters assessed were total distance travelled,

222 velocity, time spent in the open arms, number of entries to the open arms, and latency to the first  
223 entry into an open arm. The maze was thoroughly cleaned with 70% ethanol in between subjects.

224

### 225 *Auditory discrimination test*

226 Mice were first trained in an auditory two-alternative choice (2-AC) procedure as previously  
227 described (Ahrens et al., 2015). Briefly, mice initiated each trial by poking their nose into the  
228 center port of a three-port operant chamber. After a silent delay of random duration (200–300  
229 ms, uniformly distributed), a frequency-modulated target sound was presented. The carrier  
230 frequency of the target indicated to the animal which of the two side ports would provide 10  $\mu$ l  
231 of water reward. For a target carrier frequency of 4kHz, reward was available only at the left  
232 port. For a target of 12 kHz, reward was provided at the right port. Mice were only rewarded in  
233 trials in which they chose the correct port as their first choice. Sound intensity was set at 60 dB-  
234 SPL, and sound duration was 100 ms. The modulation frequency was set to 15 Hz. Incorrect  
235 choices were punished by a 4s timeout and a white noise presentation.

236

237 After mice reached a performance level of 70% in the 2-AC task, they were tested for auditory  
238 discrimination. Mice initiated a trial by a nose poke into the center port. After a silent delay of  
239 random duration (200-300 ms), a frequency modulated sound was presented for 100 ms. The  
240 frequency of the sound was randomly selected from a group of eight frequencies (4, 4.68, 5.48,  
241 6.4, 7.49, 8.77, 10.26 and 12 kHz). These frequencies were chosen such that they were  
242 equidistant from each other on the logarithmic ( $\text{Log}_2$ ) scale. All frequencies less than 6.9 kHz  
243 (the geometric mean of 4 and 12 kHz) were rewarded if the mouse chose the left water port, and  
244 those greater than 6.9 kHz were rewarded with water in the right water port. The volume of the

245 water reward was 5  $\mu$ l to ensure that the mice performed sufficient number of trials for each of  
246 the frequencies. Data from five consecutive sessions were collected (250-350 trials per session).  
247 Responses of each mouse to the eight sound frequencies was transformed into the percentage of  
248 ‘proportion right choice’, which is the percentage of the trials in which the mouse chose the  
249 water port on the right side. These data were fitted using the following logistic function(Ahrens  
250 et al., 2015; Gilchrist et al., 2005):

$$251 \quad y = \frac{A1 - A2}{1 + \left(\frac{X_0}{X}\right)^p} + A2$$

252 where  $X_0$  represents the median threshold and  $p$  determines the slope of the curve;  $A1$  and  $A2$  are  
253 the upper and lower bounds of the equation, respectively. A sigmoidal psychometric curve was  
254 thus generated. The median threshold  $X_0$  and parameter  $p$  of this curve were then obtained for  
255 each animal, and the data were pooled for each group.

256

### 257 **Stereotaxic Surgery**

258 Standard surgical procedures were followed for stereotaxic injection (Li et al., 2013; Penzo et al.,  
259 2015; Yu et al., 2016, 2017). Briefly, mice were anesthetized with isoflurane (3% at the  
260 beginning and 1% for the rest of the surgical procedure), and positioned in a stereotaxic injection  
261 frame (myNeuroLab.com). A digital mouse brain atlas was linked to the injection frame to guide  
262 the identification and targeting (Angle Two Stereotaxic System, myNeuroLab.com). The  
263 injection was performed at the following stereotaxic coordinates for GPe: -0.46 mm from  
264 Bregma, 1.85 mm lateral from the midline, and 3.79 mm vertical from skull surface.

265

266 For injection of the retrograde tracer, we made a small cranial window (1–2 mm<sup>2</sup>), through  
267 which the tracer (~0.3  $\mu$ l) was delivered via a glass micropipette (tip diameter, ~5  $\mu$ m) by

268 pressure application (5–20 psi, 5–20 ms at 0.5 Hz) controlled by a Picospritzer III (General  
269 Valve) and a pulse generator (Agilent). During the surgical procedure, mice were kept on a  
270 heating pad maintained at 35°C and were brought back to their home-cage for post-surgery  
271 recovery and monitoring. Subcutaneous Metacam (1-2 mg kg<sup>-1</sup> meloxicam; Boehringer  
272 Ingelheim Vetmedica, Inc.) was given post-operatively for analgesia and anti-inflammatory  
273 purposes.

274

275 The retrograde tracer cholera toxin subunit B (CTB) conjugated with Alexa Fluor™ 555 (CTB-  
276 555) was purchased from Invitrogen, Thermo Fisher Scientific (Waltham, Massachusetts, USA).  
277 CTB was used at a concentration of 1mg/ml in phosphate-buffered saline and kept at -20°C.

278

### 279 ***In vitro* electrophysiology**

280 For the *in vitro* electrophysiology experiments, mice were anaesthetized with isoflurane and  
281 perfused intracardially with 20 mL ice-cold artificial cerebrospinal fluid (ACSF) (118 mM NaCl,  
282 2.5 mM KCl, 26.2 mM NaHCO<sub>3</sub>, 1 mM NaH<sub>2</sub>PO<sub>4</sub>, 20 mM glucose, 2 mM MgCl<sub>2</sub> and 2 mM  
283 CaCl<sub>2</sub>, pH 7.4, gassed with 95% O<sub>2</sub> and 5% CO<sub>2</sub>). Mice were then decapitated and their brains  
284 quickly removed and submerged in ice-cold dissection buffer (110.0 mM choline chloride, 25.0  
285 mM NaHCO<sub>3</sub>, 1.25 mM NaH<sub>2</sub>PO<sub>4</sub>, 2.5 mM KCl, 0.5 mM CaCl<sub>2</sub>, 7.0 mM MgCl<sub>2</sub>, 25.0 mM  
286 glucose, 11.6 mM ascorbic acid and 3.1mM pyruvic acid, gassed with 95% O<sub>2</sub> and 5% CO<sub>2</sub>).  
287 Coronal sections of 300 μm containing the central amygdala (CeA) were cut in dissection buffer  
288 using a HM650 Vibrating-blade Microtome (Thermo Fisher Scientific). Slices were immediately  
289 transferred to a storage chamber containing ACSF at 34 °C. After 40 min recovery time, slices  
290 were transferred to room temperature (20–24°C) and perfused with gassed ACSF constantly

291 throughout recording.

292

293 Whole-cell patch clamp recording was performed as previously described (Li et al., 2013).

294 Briefly, recording from CeA neurons was obtained with Multiclamp 700B amplifiers and

295 pCLAMP 10 software (Molecular Devices, Sunnyvale, California, USA), and was visually

296 guided using an Olympus BX51 microscope equipped with both transmitted and epifluorescence

297 light sources (Olympus Corporation, Shinjuku, Tokyo, Japan). The external solution was ACSF.

298 The internal solution contained 115 mM cesium methanesulfonate, 20 mM CsCl, 10 mM

299 HEPES, 2.5 mM MgCl<sub>2</sub>, 4 mM Na<sub>2</sub>ATP, 0.4 mM Na<sub>3</sub>GTP, 10 mM sodium phosphocreatine and

300 0.6 mM EGTA (pH 7.2). Miniature excitatory post-synaptic currents (mEPSCs) were recorded at

301 -70 mV with bath application of 100 μM GABA antagonist, picrotoxin (PTX), and 1 μM sodium

302 channel blocker, tetrodotoxin (TTX). The internal solution contained 115 mM cesium

303 methanesulphonate, 20 mM CsCl, 10 mM HEPES, 2.5 mM MgCl<sub>2</sub>, 4 mM Na<sub>2</sub>-ATP, 0.4 mM

304 Na<sub>3</sub>GTP, 10 mM Na-phosphocreatine and 0.6 mM EGTA (pH 7.2, 290 mOsm). Data was

305 collected in gap-free mode in pClamp 10 (Molecular Devices) for 5 minutes at room temperature

306 and analyzed using Mini Analysis Program (Synaptosoft). For recordings on CeA neurons

307 projecting to the GPe, CTB-555 was injected into the GPe 3 days prior to the recording. Slices of

308 the GPe were examined for accuracy in the injection location. Animals with incorrect injection

309 locations were not used for recording.

310

### 311 **Data analysis and statistics**

312 All statistics are indicated where used. Statistical analyses were performed with GraphPad Prism

313 Software (GraphPad Software, Inc., La Jolla, CA). Normality was tested by D'Agostino-Pearson

314 or Shapiro-Wilk normality tests. Non-normal datasets were log-transformed for normality before  
315 statistical testing. All behavioral experiments were controlled by computer systems, and data  
316 were collected and analyzed in an automated and unbiased way. Virus-injected animals in which  
317 the injection site was incorrect were excluded. No other animals were excluded.

318

## 319 **Results**

### 320 **Female-specific increase in fear generalization in *16p11.2 del/+* mice**

321 One hallmark of anxiety disorders is fear generalization (Dunsmoor & Paz, 2015). Fear  
322 generalization can be assessed in mice using a fear conditioning paradigm with a discrimination  
323 component (see Methods), in which mice are trained to associate one auditory stimulus  
324 (conditioned stimulus, CS) (CS+) with a foot shock (unconditioned stimulus, US), while a  
325 different auditory stimulus (CS-) is presented without the shock. In a fear retrieval test 24 hours  
326 following the conditioning, both freezing in response to the CS+ and that to the CS- are  
327 measured and used to calculate a discrimination index, which is the difference between an  
328 animal's average freezing to the CS+ and that to the CS-, normalized to the sum of the two  
329 measurements.

330

331 Interestingly, we found that during a habituation session before the conditioning, female *16p11.2*  
332 *del/+* mice showed small (10-20%) but robust increase in freezing to the auditory stimuli  
333 compared with their wildtype (WT) littermates (Figure 1A, left). Male *16p11.2* mice did not  
334 show such change (Figure 1A, right). However, we did not observe a significant difference in  
335 freezing during the first tone presentation in the subsequent conditioning session (i.e., before  
336 mice received any shocks) between genotypes for either the female or the male mice (Figure 1B,

337 D), suggesting that the enhanced freezing in *16p11.2 del/+* female mice during habituation may  
338 be related to the fact that the auditory stimuli were novel to the animals.

339

340 After fear conditioning and upon memory retrieval, both female and male *16p11.2 del/+* mice  
341 showed levels of freezing similar to those of their WT littermates in response to the CS+ (Figure  
342 B, D), consistent with previous findings that *16p11.2 del/+* mice have intact fear conditioning  
343 (Lynch et al., 2020; Yang, Lewis, et al., 2015). Surprisingly, however, female, but not male  
344 *16p11.2 del/+* mice showed increased freezing to the CS- compared with WT littermates (Figure  
345 1B, D), resulting in reduced levels of fear discrimination in female, but not male *16p11.2 del/+*  
346 animals (Figure 1C, E). In addition, we found that female, but not male *16p11.2 del/+* mice  
347 showed enhanced reactions to foot shocks compared with WT mice, as measured by enhanced  
348 movement velocity and distance immediately following shocks of varying intensities (Figure 2).  
349 These results suggest that female *16p11.2 del/+* mice have enhanced fear generalization  
350 following fear conditioning, which could result from heightened alertness (as indicated by  
351 increased freezing during habituation) or an increase in sensitivity to aversive stimuli (as  
352 indicated by increase reactivity to foot shocks), or both.

353

#### 354 ***16p11.2 del/+* mice have normal auditory perception**

355 An alternative explanation for the enhanced fear generalization in female *16p11.2 del/+* mice is  
356 that these mice have an impairment in auditory processing, such that they cannot effectively  
357 discriminate between a 4-kHz tone and a 12-kHz tone, which were used as CS+ and CS-,  
358 respectively, during fear conditioning. To test this possibility, we trained a new cohort of mice,  
359 including *16p11.2 del/+* mice and their WT littermates, in an auditory two-alternative choice (2-



360 AC) task that depended on discriminating between a 4-kHz tone and a 12-kHz tone (Figure 3A;  
361 see Methods) (Ahrens et al., 2015). Both female and male *16p11.2 del/+* mice learned the 2-AC  
362 task at a rate similar to that of their WT littermates (Figure 3B, C). In fact, male *16p11.2 del/+*  
363 mice tended to be faster than WT mice in learning the task (Figure 3C), though this difference  
364 did not reach significance. In addition, the performance of female and male *16p11.2 del/+* mice  
365 in discriminating a series of sounds with frequencies ranging from 4 to 12 kHz (Figure 3D-F and  
366 H-J), or with different intensities (Figure 3G, K), was indistinguishable from their WT  
367 littermates. These results indicate that *16p11.2* microdeletion does not affect auditory perception  
368 in mice, ruling out the possibility that the enhanced fear generalization in female *16p11.2 del/+*  
369 mice is confounded by an impairment in auditory processing in these mice.

370

### 371 **Stress induces an increase in anxiety in female *16p11.2 del/+* mice**

372 In fear conditioning, mice receive electric shocks as the aversive US, which is a significant  
373 stressor to animals. Therefore, the enhanced fear generalization in female *16p11.2 del/+* mice  
374 after fear conditioning points to a possibility that these animals are prone to stress-induced  
375 anxiety. To further test this possibility, we sought to examine anxiety-like behaviors in mice  
376 subjected to a different stressor. For this purpose, we used physical restraint (Methods), a well  
377 characterized stress-induction procedure in rodents which has been shown to affect the function  
378 of the central amygdala (Varodayan et al., 2018, 2019). As described previously (Zimprich et al.,  
379 2014), animals are physically restrained in a well-ventilated 50 mL conical tube for 2 hours in a  
380 dark, sound attenuated box. 24 hours later, animals were tested on the EPM (Methods). We  
381 found a significant interaction between sex and genotype in the time spent in the open arms  
382 (Figure 4A) and significant effects of sex on movement velocity (Figure 4B) and distance

383 traveled (Figure 4C). Post-hoc analysis revealed that the stressed female *16p11.2 del/+* mice  
384 spent significantly less time in the open arms of the EPM compared to their female WT  
385 littermates (Figure 4A). We did not find any change in time spent in the open arms in male  
386 *16p11.2 del/+* mice.

387

388 We also examined anxiety levels in naïve mice using the EPM test. Compared with naïve female  
389 or male WT littermates, naïve female or male *16p11.2 del/+* mice, respectively, did not show  
390 any change in the time spent in the open arms (Figure 4D), movement velocity (Figure 4E) and  
391 distance traveled (Figure 4F). This result is consistent with previous findings (Arbogast et al.,  
392 2016; Lynch et al., 2020; Yang, Lewis, et al., 2015). Together, our results indicate that female  
393 *16p11.2 del/+* mice have increased susceptibility to stress-induced anxiety.

394

### 395 ***16p11.2 del/+* mice have central amygdala dysfunction**

396 Previous studies have revealed that the central amygdala (CeA) is particularly responsive to  
397 stress and is a major contributor to anxiety-related behaviors (Ahrens et al., 2018; Fox et al.,  
398 2012; Shackman & Fox, 2016). Therefore, we examined whether the *16p11.2* microdeletion  
399 affects CeA neuronal function in a sex-specific manner. We recorded miniature excitatory  
400 postsynaptic currents (mEPSCs) – a measurement of total excitatory synaptic drive onto the  
401 recorded neurons – from CeA neurons in acute brain slices prepared from female or male  
402 *16p11.2 del/+* mice, as well as their respective WT littermates (Figure 5A). We found significant  
403 effects of sex and genotype on mEPSC frequency in randomly recorded central amygdala  
404 neurons (Figure 5B-D). Post-hoc analysis revealed that females with *16p11.2* microdeletion  
405 specifically had increased mEPSC frequency compared with female wildtype littermates. There

406 was no difference in mEPSC amplitude between genotypes or sexes (Figure 5E). These results  
407 indicate that female, but not male *16p11.2 del/+* mice have enhanced excitatory synaptic drive  
408 onto CeA neurons.

409

410 We recently identified a pathway from the CeA to the globus pallidus externa (GPe), which  
411 conveys information of the US and is critical for learning in fear conditioning (Giovanniello et  
412 al., 2020). Importantly, optogenetic activation of the CeA-GPe pathway increases fear  
413 generalization whereby animals increase their freezing to CS-. Therefore, we sought to  
414 determine whether the GPe-projecting CeA neurons are affected by the *16p11.2* microdeletion.  
415 To this end, we used a retrograde labeling strategy whereby fluorescently conjugated CTB was  
416 injected in the GPe to label the GPe-projecting CeA neurons (Figure 6A; Methods). Three days  
417 after the CTB injection, we recorded mEPSCs selectively from the CTB-labeled GPe-projecting  
418 CeA neurons in acute brain slices prepared from female or male *16p11.2 del/+* mice, as well as  
419 their respective WT littermates (Figure 6A, B). Again, we found a significant interaction  
420 between sex and genotype whereby females with *16p11.2* microdeletion exhibited increased  
421 mEPSC frequency compared with wildtype littermates (Figure 6D, E). Thus, our results indicate  
422 that the *16p11.2* microdeletion caused a female-specific enhancement of excitatory synaptic  
423 drive onto CeA neurons, and moreover suggests dysfunction in the CeA-GPe pathway as a  
424 potential mechanism for the increased stress susceptibility and fear generalization identified in  
425 female *16p11.2 del/+* mice.

426

## 427 **Discussion**

428 Our results indicate that female, but not male, *16p11.2 del/+* mice have increased susceptibility

429 to anxiety-like phenotypes following stressful life events, revealing a previously  
430 underappreciated sex-specific effect in the modulation of behavior by 16p11.2 microdeletion.  
431 Furthermore, we identify that CeA dysfunction, in particular that in the CeA-GPe circuit, may  
432 underlie the female-specific behavioral phenotypes caused by the 16p11.2 microdeletion. These  
433 findings are consistent with the vast literature that females affected with ASD show distinct  
434 behavioral symptoms compared with males (Beggiato et al., 2017; Dean et al., 2017; Head et al.,  
435 2014; Hiller et al., 2014; Werling & Geschwind, 2013) in particular the more internalizing  
436 symptoms and emotional disturbances (Horiuchi et al., 2014; Kreiser & White, 2014;  
437 Rynkiewicz et al., 2016; Rynkiewicz & Łucka, 2018; Solomon et al., 2012). Our findings are  
438 also consistent with the notion that in the general population, females have an increased  
439 prevalence of stress-related disorders such as anxiety, depression, and PTSD (Breslau, 2002;  
440 Kessler et al., 1995; Olf, 2017; Tolin & Foa, 2006). Our study thus urges a careful examination  
441 of anxiety and other emotional symptoms, as well as functional changes in the amygdala-basal  
442 ganglia circuits in 16p11.2 microdeletion carriers, in particular in female carriers. In general, our  
443 study also urges sex-specific diagnostic and treatment strategies for ASD.

444

445 Three lines of evidence suggest that heightened alertness or an increase in sensitivity to aversive  
446 stimuli, or to the stimuli signaling potential threat, may underlie the increased susceptibility to  
447 anxiety-like phenotypes in female *16p11.2 del/+* mice following stressful experiences. First,  
448 *16p11.2 del/+* mice, especially females, show increased freezing when they are exposed to an  
449 unfamiliar sound, which is a sign of uncertainty or potential danger. Second, female *16p11.2*  
450 *del/+* mice have enhanced reactivity to foot shocks. Third, CeA neurons in female *16p11.2 del/+*  
451 mice have enhanced sensitivity to excitatory inputs. This enhanced sensitivity may lead to

452 heightened alertness or attention, as the CeA has been implicated in selective processing of  
453 salient information (Calu et al., 2010; Roesch et al., 2012).

454

455 The CeA has central roles in the generation of fear and anxiety states (Ahrens et al., 2018;  
456 Andreatta et al., 2015; Calhoun & Tye, 2015; Davis et al., 2010; Etkin & Wager, 2007; Fox et  
457 al., 2012, 2015; Gungor & Paré, 2016; Jennings et al., 2013; S.-Y. Kim et al., 2013; Li et al.,  
458 2013; Marcinkiewicz et al., 2016; Mobbs et al., 2010; Penzo et al., 2015; Shackman & Fox, 2016;  
459 Tovote et al., 2015; Wager et al., 2008; Walker & Davis, 2008; Yu et al., 2017). In parallel,  
460 amygdala dysfunction has been implicated in the pathogenesis of ASD. Abnormal developmental  
461 trajectory of the amygdala has been observed in ASD (Amaral et al., 2008). Brain imaging  
462 studies indicate that the amygdala is enlarged precociously in children with autism (Schumann et  
463 al., 2004; Sparks et al., 2002), and that amygdala enlargement in autistic children is associated  
464 with anxiety symptoms (Juranek et al., 2006). In addition, cellular changes in the amygdala have  
465 been reported in ASD (Amaral et al., 2008). In a recent study (Giovanniello et al., 2020), we  
466 found that a subpopulation of neurons in the CeA send direct projections to the GPe, and the  
467 CeA-GPe pathway conveys US information and controls learning during fear conditioning. In  
468 the current study, we found that an enhanced excitatory drive onto GPe-projecting CeA neurons  
469 parallels the anxiety phenotypes of female *16p11.2 del/+* mice. These findings together strongly  
470 suggest a role of CeA-GPe circuit dysfunction in susceptibility to anxiety after stress, and  
471 warrant future studies to elucidate how this circuit is involved in 16p11.2 microdeletion  
472 syndrome.

473

474 **Acknowledgements**

475 We thank members of the Li laboratory for helpful discussions, Pavel Osten for providing  
476 *16p11.2 Del/+* breeders, and Alea Mills for providing primers for genotyping the *16p11.2 del/+*  
477 mice. This work was supported by grants from the National Institutes of Health (NIH)  
478 (R01MH101214, R21MH114070, B.L.), Simons Foundation (344904, B.L.), National Alliance  
479 for Research on Schizophrenia and Depression (Grant 23169, B.L.; Grant 21227, S.A.), the Cold  
480 Spring Harbor Laboratory and Northwell Health Affiliation (B.L.) and Feil Family Neuroscience  
481 Endowment (B.L.).

482

### 483 **Author contributions**

484 J.G. and B.L. conceived and designed the study. J.G. conducted the experiments and analyzed  
485 data. S.A. conducted the experiments with the auditory discrimination task and assisted with  
486 other electrophysiology experiments. K.Y. identified the CeA-GPe projections and assisted with  
487 experiments. J.G. and B.L. wrote the paper with input from all authors.

488

### 489 **Competing interests**

490 The authors declare no competing financial interests.

491

### 492 **References**

493

494

495 Ahrens, S., Jaramillo, S., Yu, K., Ghosh, S., Hwang, G.-R., Paik, R., Lai, C., He, M., Huang, Z.  
496 J., & Li, B. (2015). ErbB4 regulation of a thalamic reticular nucleus circuit for sensory  
497 selection. *Nature Neuroscience*, *18*(1), 104–111. <https://doi.org/10.1038/nn.3897>

498 Ahrens, S., Wu, M. V., Furlan, A., Hwang, G.-R., Paik, R., Li, H., Penzo, M. A., Tollkuhn, J., &  
499 Li, B. (2018). A Central Extended Amygdala Circuit That Modulates Anxiety. *The Journal of*  
500 *Neuroscience*, *38*(24), 5567–5583. <https://doi.org/10.1523/jneurosci.0705-18.2018>

- 501 Al-Kateb, H., Khanna, G., Filges, I., Hauser, N., Grange, D. K., Shen, J., Smyser, C. D.,  
502 Kulkarni, S., & Shinawi, M. (2014). Scoliosis and vertebral anomalies: Additional abnormal  
503 phenotypes associated with chromosome 16p11.2 rearrangement. *American Journal of*  
504 *Medical Genetics Part A*, 164(5), 1118–1126. <https://doi.org/10.1002/ajmg.a.36401>
- 505 Amaral, D. G., Schumann, C. M., & Nordahl, C. W. (2008). Neuroanatomy of autism. *Trends in*  
506 *Neurosciences*, 31(3), 137–145. <https://doi.org/10.1016/j.tins.2007.12.005>
- 507 Andersen, P. N., Skogli, E. W., Hovik, K. T., Egeland, J., & Øie, M. (2015). Associations  
508 Among Symptoms of Autism, Symptoms of Depression and Executive Functions in Children  
509 with High-Functioning Autism: A 2 Year Follow-Up Study. *Journal of Autism and*  
510 *Developmental Disorders*, 45(8), 2497–2507. <https://doi.org/10.1007/s10803-015-2415-8>
- 511 Andreatta, M., Glotzbach-Schoon, E., Mühlberger, A., Schulz, S. M., Wiemer, J., & Pauli, P.  
512 (2015). Initial and sustained brain responses to contextual conditioned anxiety in humans.  
513 *Cortex*, 63, 352–363. <https://doi.org/10.1016/j.cortex.2014.09.014>
- 514 Angelakos, C. C., Watson, A. J., O'Brien, W. T., Krainock, K. S., Nickl-Jockschat, T., & Abel,  
515 T. (2017). Hyperactivity and male-specific sleep deficits in the 16p11.2 deletion mouse model  
516 of autism. *Autism Research*, 10(4), 572–584. <https://doi.org/10.1002/aur.1707>
- 517 Antshel, K. M., & Russo, N. (2019). Autism Spectrum Disorders and ADHD: Overlapping  
518 Phenomenology, Diagnostic Issues, and Treatment Considerations. *Current Psychiatry*  
519 *Reports*, 21(5), 34. <https://doi.org/10.1007/s11920-019-1020-5>
- 520 Antshel, K. M., Zhang-James, Y., & Faraone, S. V. (2014). The comorbidity of ADHD and  
521 autism spectrum disorder. *Expert Review of Neurotherapeutics*, 13(10), 1117–1128.  
522 <https://doi.org/10.1586/14737175.2013.840417>
- 523 Antshel, K. M., Zhang-James, Y., Wagner, K. E., Ledesma, A., & Faraone, S. V. (2016). An  
524 update on the comorbidity of ADHD and ASD: a focus on clinical management. *Expert*  
525 *Review of Neurotherapeutics*, 16(3), 1–15. <https://doi.org/10.1586/14737175.2016.1146591>
- 526 Arbogast, T., Ouagazzal, A.-M., Chevalier, C., Kopanitsa, M., Afinowi, N., Migliavacca, E.,  
527 Cowling, B. S., Birling, M.-C., Champy, M.-F., Reymond, A., & Hérault, Y. (2016).  
528 Reciprocal Effects on Neurocognitive and Metabolic Phenotypes in Mouse Models of  
529 16p11.2 Deletion and Duplication Syndromes. *PLOS Genetics*, 12(2), e1005709.  
530 <https://doi.org/10.1371/journal.pgen.1005709>
- 531 Baio, J., Wiggins, L., Christensen, D. L., Maenner, M. J., Daniels, J., Warren, Z., Kurzius-  
532 Spencer, M., Zahorodny, W., Robinson, C., Rosenberg, White, T., Durkin, M. S., Imm, P.,  
533 Nikolaou, L., Yeargin-Allsopp, M., Lee, L.-C., Harrington, R., Lopez, M., Fitzgerald, R. T.,  
534 ... Dowling, N. F. (2018). Prevalence of Autism Spectrum Disorder Among Children Aged 8  
535 Years — Autism and Developmental Disabilities Monitoring Network, 11 Sites, United  
536 States, 2014. *MMWR Surveillance Summaries*, 67(6), 1–23.  
537 <https://doi.org/10.15585/mmwr.ss6706a1>



- 538 Baron-Cohen, S. (2009). Autism: The Empathizing–Systemizing (E-S) Theory. *Annals of the*  
539 *New York Academy of Sciences*, 1156(1), 68–80. <https://doi.org/10.1111/j.1749->  
540 [6632.2009.04467.x](https://doi.org/10.1111/j.1749-6632.2009.04467.x)
- 541 Beery, A. K., & Zucker, I. (2011). Sex bias in neuroscience and biomedical research.  
542 *Neuroscience & Biobehavioral Reviews*, 35(3), 565–572.  
543 <https://doi.org/10.1016/j.neubiorev.2010.07.002>
- 544 Beggiato, A., Peyre, H., Maruani, A., Scheid, I., Rastam, M., Amsellem, F., Gillberg, C. I.,  
545 Leboyer, M., Bourgeron, T., Gillberg, C., & Delorme, R. (2017). Gender differences in  
546 autism spectrum disorders: Divergence among specific core symptoms. *Autism Research*,  
547 10(4), 680–689. <https://doi.org/10.1002/aur.1715>
- 548 Bijlsma, E. K., Gijbbers, A. C. J., Schuurs-Hoeijmakers, J. H. M., Haeringen, A. van, Putte, D. E.  
549 F. van de, Anderlid, B.-M., Lundin, J., Lapunzina, P., Jurado, L. A. P., Chiaie, B. D., Loeys,  
550 B., Menten, B., Oostra, A., Verhelst, H., Amor, D. J., Bruno, D. L., Essen, A. J. van, Hordijk,  
551 R., Sikkema-Raddatz, B., ... Ruivenkamp, C. A. L. (2009). Extending the phenotype of  
552 recurrent rearrangements of 16p11.2: Deletions in mentally retarded patients without autism  
553 and in normal individuals. *European Journal of Medical Genetics*, 52(2–3), 77–87.  
554 <https://doi.org/10.1016/j.ejmg.2009.03.006>
- 555 Bölte, S., Duketis, E., Poustka, F., & Holtmann, M. (2011). Sex differences in cognitive domains  
556 and their clinical correlates in higher-functioning autism spectrum disorders. *Autism*, 15(4),  
557 497–511. <https://doi.org/10.1177/1362361310391116>
- 558 Breslau, N. (2002). Gender differences in trauma and posttraumatic stress disorder. *The Journal*  
559 *of Gender-Specific Medicine : JGSM : The Official Journal of the Partnership for Women's*  
560 *Health at Columbia*, 5(1), 34–40.
- 561 Brookman-Frazee, L., Stadnick, N., Chlebowski, C., Baker-Ericzén, M., & Ganger, W. (2018).  
562 Characterizing psychiatric comorbidity in children with autism spectrum disorder receiving  
563 publicly funded mental health services. *Autism*, 22(8), 938–952.  
564 <https://doi.org/10.1177/1362361317712650>
- 565 Calhoun, G. G., & Tye, K. M. (2015). Resolving the neural circuits of anxiety. *Nature*  
566 *Neuroscience*, 18(10), 1394–1404. <https://doi.org/10.1038/nn.4101>
- 567 Calu, D. J., Roesch, M. R., Haney, R. Z., Holland, P. C., & Schoenbaum, G. (2010). Neural  
568 Correlates of Variations in Event Processing during Learning in Central Nucleus of  
569 Amygdala. *Neuron*, 68(5), 991–1001. <https://doi.org/10.1016/j.neuron.2010.11.019>
- 570 Chen, C.-H., Chen, H.-I., Chien, W.-H., Li, L.-H., Wu, Y.-Y., Chiu, Y.-N., Tsai, W.-C., & Gau,  
571 S. S.-F. (2017). High resolution analysis of rare copy number variants in patients with autism  
572 spectrum disorder from Taiwan. *Scientific Reports*, 7(1), 11919.  
573 <https://doi.org/10.1038/s41598-017-12081-4>



- 574 Dalla, C., & Shors, T. J. (2009). Sex differences in learning processes of classical and operant  
575 conditioning. *Physiology & Behavior*, *97*(2), 229–238.  
576 <https://doi.org/10.1016/j.physbeh.2009.02.035>
- 577 Davidsson, M., Hult, N., Gillberg, C., Särneö, C., Gillberg, C., & Billstedt, E. (2017). Anxiety  
578 and depression in adolescents with ADHD and autism spectrum disorders; correlation  
579 between parent- and self-reports and with attention and adaptive functioning. *Nordic Journal*  
580 *of Psychiatry*, *71*(8), 1–7. <https://doi.org/10.1080/08039488.2017.1367840>
- 581 Davis, M., Walker, D. L., Miles, L., & Grillon, C. (2010). Phasic vs Sustained Fear in Rats and  
582 Humans: Role of the Extended Amygdala in Fear vs Anxiety. *Neuropsychopharmacology*,  
583 *35*(1), 105–135. <https://doi.org/10.1038/npp.2009.109>
- 584 Dean, M., Harwood, R., & Kasari, C. (2017). The art of camouflage: Gender differences in the  
585 social behaviors of girls and boys with autism spectrum disorder. *Autism*, *21*(6), 678–689.  
586 <https://doi.org/10.1177/1362361316671845>
- 587 *Diagnostic and Statistical Manual of Mental Disorders, DSM-5* (5th ed.). (2013). American  
588 Psychiatric Association. <https://doi.org/10.5555/appi.books.9780890425596.x00pre>
- 589 Dunsmoor, J. E., & Paz, R. (2015). Fear Generalization and Anxiety: Behavioral and Neural  
590 Mechanisms. *Biological Psychiatry*, *78*(5), 336–343.  
591 <https://doi.org/10.1016/j.biopsych.2015.04.010>
- 592 Etkin, A., & Wager, T. D. (2007). Functional Neuroimaging of Anxiety: A Meta-Analysis of  
593 Emotional Processing in PTSD, Social Anxiety Disorder, and Specific Phobia. *American*  
594 *Journal of Psychiatry*, *164*(10), 1476–1488. <https://doi.org/10.1176/appi.ajp.2007.07030504>
- 595 Fernandez, B. A., Roberts, W., Chung, B., Weksberg, R., Meyn, S., Szatmari, P., Joseph-George,  
596 A. M., MacKay, S., Whitten, K., Noble, B., Vardy, C., Crosbie, V., Luscombe, S., Tucker, E.,  
597 Turner, L., Marshall, C. R., & Scherer, S. W. (2010). Phenotypic spectrum associated with de  
598 novo and inherited deletions and duplications at 16p11.2 in individuals ascertained for  
599 diagnosis of autism spectrum disorder. *Journal of Medical Genetics*, *47*(3), 195.  
600 <https://doi.org/10.1136/jmg.2009.069369>
- 601 Fombonne, E. (2002). Epidemiological trends in rates of autism. *Molecular Psychiatry*, *7*(S2),  
602 S4. <https://doi.org/10.1038/sj.mp.4001162>
- 603 Fox, A. S., Oler, J. A., Shelton, S. E., Nanda, S. A., Davidson, R. J., Roseboom, P. H., & Kalin,  
604 N. H. (2012). Central amygdala nucleus (Ce) gene expression linked to increased trait-like Ce  
605 metabolism and anxious temperament in young primates. *Proceedings of the National*  
606 *Academy of Sciences*, *109*(44), 18108–18113. <https://doi.org/10.1073/pnas.1206723109>
- 607 Fox, A. S., Oler, J. A., Tromp, D. P. M., Fudge, J. L., & Kalin, N. H. (2015). Extending the  
608 amygdala in theories of threat processing. *Trends in Neurosciences*, *38*(5), 319–329.  
609 <https://doi.org/10.1016/j.tins.2015.03.002>

- 610 Giarelli, E., Wiggins, L. D., Rice, C. E., Levy, S. E., Kirby, R. S., Pinto-Martin, J., & Mandell,  
611 D. (2010). Sex differences in the evaluation and diagnosis of autism spectrum disorders  
612 among children. *Disability and Health Journal*, 3(2), 107–116.  
613 <https://doi.org/10.1016/j.dhjo.2009.07.001>
- 614 Gilchrist, J. M., Jerwood, D., & Ismaiel, H. S. (2005). Comparing and unifying slope estimates  
615 across psychometric function models. *Perception & Psychophysics*, 67(7), 1289–1303.  
616 <https://doi.org/10.3758/bf03193560>
- 617 Giovanniello, J., Yu, K., Furlan, A., Nachtrab, G. T., Sharma, R., Chen, X., & Li, B. (2020). A  
618 central amygdala-globus pallidus circuit conveys unconditioned stimulus-related information  
619 and controls fear learning. *The Journal of Neuroscience*, JN-RM-2090-20.  
620 <https://doi.org/10.1523/jneurosci.2090-20.2020>
- 621 Gotham, K., Bishop, S. L., Hus, V., Huerta, M., Lund, S., Buja, A., Krieger, A., & Lord, C.  
622 (2013). Exploring the Relationship Between Anxiety and Insistence on Sameness in Autism  
623 Spectrum Disorders. *Autism Research*, 6(1), 33–41. <https://doi.org/10.1002/aur.1263>
- 624 Grissom, N. M., McKee, S. E., Schoch, H., Bowman, N., Havekes, R., O'Brien, W. T., Mahrt,  
625 E., Siegel, S., Commons, K., Portfors, C., Nickl-Jockschat, T., Reyes, T. M., & Abel, T.  
626 (2017). Male-specific deficits in natural reward learning in a mouse model of  
627 neurodevelopmental disorders. *Molecular Psychiatry*, 23(3), 544.  
628 <https://doi.org/10.1038/mp.2017.184>
- 629 Gruene, T. M., Flick, K., Stefano, A., Shea, S. D., & Shansky, R. M. (2015). Sexually divergent  
630 expression of active and passive conditioned fear responses in rats. *ELife*, 4, e11352.  
631 <https://doi.org/10.7554/elife.11352>
- 632 Gungor, N. Z., & Paré, D. (2016). Functional Heterogeneity in the Bed Nucleus of the Stria  
633 Terminalis. *The Journal of Neuroscience*, 36(31), 8038–8049.  
634 <https://doi.org/10.1523/jneurosci.0856-16.2016>
- 635 Hartley, S. L., & Sikora, D. M. (2009). Sex Differences in Autism Spectrum Disorder: An  
636 Examination of Developmental Functioning, Autistic Symptoms, and Coexisting Behavior  
637 Problems in Toddlers. *Journal of Autism and Developmental Disorders*, 39(12), 1715.  
638 <https://doi.org/10.1007/s10803-009-0810-8>
- 639 Head, A. M., McGillivray, J. A., & Stokes, M. A. (2014). Gender differences in emotionality and  
640 sociability in children with autism spectrum disorders. *Molecular Autism*, 5(1), 19.  
641 <https://doi.org/10.1186/2040-2392-5-19>
- 642 Hiller, R. M., Young, R. L., & Weber, N. (2014). Sex Differences in Autism Spectrum Disorder  
643 based on DSM-5 Criteria: Evidence from Clinician and Teacher Reporting. *Journal of*  
644 *Abnormal Child Psychology*, 42(8), 1381–1393. <https://doi.org/10.1007/s10802-014-9881-x>

- 645 Hirvikoski, T, Boman, M., Chen, Q., D’Onofrio, B. M., Mittendorfer-Rutz, E., Lichtenstein, P.,  
646 Bölte, S., & Larsson, H. (2019). Individual risk and familial liability for suicide attempt and  
647 suicide in autism: a population-based study. *Psychological Medicine*, 1–12.  
648 <https://doi.org/10.1017/s0033291719001405>
- 649 Hirvikoski, Tatja, Mittendorfer-Rutz, E., Boman, M., Larsson, H., Lichtenstein, P., & Bölte, S.  
650 (2016). Premature mortality in autism spectrum disorder. *British Journal of Psychiatry*,  
651 208(3), 232–238. <https://doi.org/10.1192/bjp.bp.114.160192>
- 652 Horev, G., Ellegood, J., Lerch, J. P., Son, Y.-E. E., Muthuswamy, L., Vogel, H., Krieger, A. M.,  
653 Buja, A., Henkelman, R. M., Wigler, M., & Mills, A. A. (2011). Dosage-dependent  
654 phenotypes in models of 16p11.2 lesions found in autism. *Proceedings of the National  
655 Academy of Sciences*, 108(41), 17076–17081. <https://doi.org/10.1073/pnas.1114042108>
- 656 Horiuchi, F., Oka, Y., Uno, H., Kawabe, K., Okada, F., Saito, I., Tanigawa, T., & Ueno, S.  
657 (2014). Age- and sex-related emotional and behavioral problems in children with autism  
658 spectrum disorders: Comparison with control children. *Psychiatry and Clinical  
659 Neurosciences*, 68(7), 542–550. <https://doi.org/10.1111/pcn.12164>
- 660 Howlin, P. (2000). Autism and intellectual disability: Diagnostic and treatment issues. *Journal of  
661 the Royal Society of Medicine*, 93(7), 351–355. <https://doi.org/10.1177/014107680009300704>
- 662 Hudac, C. M., Bove, J., Barber, S., Duyzend, M., Wallace, A., Martin, C. L., Ledbetter, D. H.,  
663 Hanson, E., Goin-Kochel, R. P., Green-Snyder, L., Chung, W. K., Eichler, E. E., & Bernier,  
664 R. A. (2020). Evaluating heterogeneity in ASD symptomatology, cognitive ability, and  
665 adaptive functioning among 16p11.2 CNV carriers. *Autism Research : Official Journal of the  
666 International Society for Autism Research*. <https://doi.org/10.1002/aur.2332>
- 667 Hughes, R. N. (2007). Sex does matter; comments on the prevalence of male-only  
668 investigations of drug effects on rodent behaviour. *Behavioural Pharmacology*, 18(7), 583–  
669 589. <https://doi.org/10.1097/fbp.0b013e3282eff0e8>
- 670 Jang, J., Matson, J. L., Williams, L. W., Tureck, K., Goldin, R. L., & Cervantes, P. E. (2013).  
671 Rates of comorbid symptoms in children with ASD, ADHD, and comorbid ASD and ADHD.  
672 *Research in Developmental Disabilities*, 34(8), 2369–2378.  
673 <https://doi.org/10.1016/j.ridd.2013.04.021>
- 674 Jennings, J. H., Sparta, D. R., Stamatakis, A. M., Ung, R. L., Pleil, K. E., Kash, T. L., & Stuber,  
675 G. D. (2013). Distinct extended amygdala circuits for divergent motivational states. *Nature*,  
676 496(7444), 224–228. <https://doi.org/10.1038/nature12041>
- 677 Juranek, J., Filipek, P. A., Berenji, G. R., Modahl, C., Osann, K., & Spence, M. A. (2006).  
678 Association Between Amygdala Volume and Anxiety Level: Magnetic Resonance Imaging  
679 (MRI) Study in Autistic Children. *Journal of Child Neurology*, 21(12), 1051–1058.  
680 <https://doi.org/10.1177/7010.2006.00237>

- 681 Kalyva, E. (2009). Comparison of Eating Attitudes between Adolescent Girls with and without  
682 Asperger Syndrome: Daughters' and Mothers' Reports. *Journal of Autism and Developmental*  
683 *Disorders*, 39(3), 480–486. <https://doi.org/10.1007/s10803-008-0648-5>
- 684 Kessler, R. C., Sonnega, A., Bromet, E., Hughes, M., & Nelson, C. B. (1995). Posttraumatic  
685 Stress Disorder in the National Comorbidity Survey. *Archives of General Psychiatry*, 52(12),  
686 1048–1060. <https://doi.org/10.1001/archpsyc.1995.03950240066012>
- 687 Kim, K., & Han, P. (2006). Optimization of chronic stress paradigms using anxiety- and  
688 depression-like behavioral parameters. *Journal of Neuroscience Research*, 83(3), 497–507.  
689 <https://doi.org/10.1002/jnr.20754>
- 690 Kim, S.-Y., Adhikari, A., Lee, S. Y., Marshel, J. H., Kim, C. K., Mallory, C. S., Lo, M., Pak, S.,  
691 Mattis, J., Lim, B. K., Malenka, R. C., Warden, M. R., Neve, R., Tye, K. M., & Deisseroth,  
692 K. (2013). Diverging neural pathways assemble a behavioural state from separable features in  
693 anxiety. *Nature*, 496(7444), 219–223. <https://doi.org/10.1038/nature12018>
- 694 Kirby, A. V., Bakian, A. V., Zhang, Y., Bilder, D. A., Keeshin, B. R., & Coon, H. (2019). A 20-  
695 year study of suicide death in a statewide autism population. *Autism Research*, 12(4), 658–  
696 666. <https://doi.org/10.1002/aur.2076>
- 697 Knickmeyer, R. C., Wheelwright, S., & Baron-Cohen, S. B. (2008). Sex-typical Play:  
698 Masculinization/Defeminization in Girls with an Autism Spectrum Condition. *Journal of*  
699 *Autism and Developmental Disorders*, 38(6), 1028–1035. [https://doi.org/10.1007/s10803-007-](https://doi.org/10.1007/s10803-007-0475-0)  
700 0475-0
- 701 Kopp, S., Beckung, E., & Gillberg, C. (2010). Developmental coordination disorder and other  
702 motor control problems in girls with autism spectrum disorder and/or attention-  
703 deficit/hyperactivity disorder. *Research in Developmental Disabilities*, 31(2), 350–361.  
704 <https://doi.org/10.1016/j.ridd.2009.09.017>
- 705 Kreiser, N. L., & White, S. W. (2014). ASD in Females: Are We Overstating the Gender  
706 Difference in Diagnosis? *Clinical Child and Family Psychology Review*, 17(1), 67–84.  
707 <https://doi.org/10.1007/s10567-013-0148-9>
- 708 Kumar, R. A., KaraMohamed, S., Sudi, J., Conrad, D. F., Brune, C., Badner, J. A., Gilliam, T.  
709 C., Nowak, N. J., Cook, E. H., Dobyns, W. B., & Christian, S. L. (2007). Recurrent 16p11.2  
710 microdeletions in autism. *Human Molecular Genetics*, 17(4), 628–638.  
711 <https://doi.org/10.1093/hmg/ddm376>
- 712 Lai, M.-C., Lombardo, M. V., & Baron-Cohen, S. (2014). Autism. *The Lancet*, 383(9920), 896–  
713 910. [https://doi.org/10.1016/s0140-6736\(13\)61539-1](https://doi.org/10.1016/s0140-6736(13)61539-1)
- 714 Leyfer, O. T., Folstein, S. E., Bacalman, S., Davis, N. O., Dinh, E., Morgan, J., Tager-Flusberg,  
715 H., & Lainhart, J. E. (2006). Comorbid Psychiatric Disorders in Children with Autism:

- 716 Interview Development and Rates of Disorders. *Journal of Autism and Developmental*  
717 *Disorders*, 36(7), 849–861. <https://doi.org/10.1007/s10803-006-0123-0>
- 718 Li, H., Penzo, M. A., Taniguchi, H., Kopec, C. D., Huang, Z. J., & Li, B. (2013). Experience-  
719 dependent modification of a central amygdala fear circuit. *Nature Neuroscience*, 16(3), 332.  
720 <https://doi.org/10.1038/nn.3322>
- 721 Lynch, J. F., Ferri, S. L., Angelakos, C., Schoch, H., Nickl-Jockschat, T., Gonzalez, A., O'Brien,  
722 W. T., & Abel, T. (2020). Comprehensive Behavioral Phenotyping of a 16p11.2 Del Mouse  
723 Model for Neurodevelopmental Disorders. *Autism Research*. <https://doi.org/10.1002/aur.2357>
- 724 Marcinkiewicz, C. A., Mazzone, C. M., D'Agostino, G., Halladay, L. R., Hardaway, J. A.,  
725 DiBerto, J. F., Navarro, M., Burnham, N., Cristiano, C., Dorrier, C. E., Tipton, G. J.,  
726 Ramakrishnan, C., Kozicz, T., Deisseroth, K., Thiele, T. E., McElligott, Z. A., Holmes, A.,  
727 Heisler, L. K., & Kash, T. L. (2016). Serotonin engages an anxiety and fear-promoting circuit  
728 in the extended amygdala. *Nature*, 537(7618), 97–101. <https://doi.org/10.1038/nature19318>
- 729 Marshall, C. R., Noor, A., Vincent, J. B., Lionel, A. C., Feuk, L., Skaug, J., Shago, M.,  
730 Moessner, R., Pinto, D., Ren, Y., Thiruvahindrapduram, B., Fiebig, A., Schreiber, S.,  
731 Friedman, J., Ketelaars, C. E. J., Vos, Y. J., Ficicioglu, C., Kirkpatrick, S., Nicolson, R., ...  
732 Scherer, S. W. (2008). Structural Variation of Chromosomes in Autism Spectrum Disorder.  
733 *The American Journal of Human Genetics*, 82(2), 477–488.  
734 <https://doi.org/10.1016/j.ajhg.2007.12.009>
- 735 Matson, J. L., & Cervantes, P. E. (2014). Commonly studied comorbid psychopathologies among  
736 persons with autism spectrum disorder. *Research in Developmental Disabilities*, 35(5), 952–  
737 962. <https://doi.org/10.1016/j.ridd.2014.02.012>
- 738 Mobbs, D., Yu, R., Rowe, J. B., Eich, H., FeldmanHall, O., & Dalgleish, T. (2010). Neural  
739 activity associated with monitoring the oscillating threat value of a tarantula. *Proceedings of*  
740 *the National Academy of Sciences*, 107(47), 20582–20586.  
741 <https://doi.org/10.1073/pnas.1009076107>
- 742 Olf, M. (2017). Sex and gender differences in post-traumatic stress disorder: an update.  
743 *European Journal of Psychotraumatology*, 8(sup4), 1351204.  
744 <https://doi.org/10.1080/20008198.2017.1351204>
- 745 Panzini, C. M., Ehlinger, D. G., Alchahin, A. M., Guo, Y., & Commons, K. G. (2017). 16p11.2  
746 deletion syndrome mice persevere with active coping response to acute stress – rescue by  
747 blocking 5-HT2A receptors. *Journal of Neurochemistry*, 143(6), 708–721.  
748 <https://doi.org/10.1111/jnc.14227>
- 749 Penzo, M. A., Robert, V., & Li, B. (2014). Fear Conditioning Potentiates Synaptic Transmission  
750 onto Long-Range Projection Neurons in the Lateral Subdivision of Central Amygdala. *The*  
751 *Journal of Neuroscience*, 34(7), 2432–2437. <https://doi.org/10.1523/jneurosci.4166-13.2014>



- 752 Penzo, M. A., Robert, V., Tucciarone, J., Bundel, D. D., Wang, M., Aelst, L. V., Darvas, M.,  
753 Parada, L. F., Palmiter, R. D., He, M., Huang, Z. J., & Li, B. (2015). The paraventricular  
754 thalamus controls a central amygdala fear circuit. *Nature*, *519*(7544), 455.  
755 <https://doi.org/10.1038/nature13978>
- 756 Portmann, T., Yang, M., Mao, R., Panagiotakos, G., Ellegood, J., Dolen, G., Bader, P. L.,  
757 Grueter, B. A., Goold, C., Fisher, E., Clifford, K., Rengarajan, P., Kalikhman, D., Loureiro,  
758 D., Saw, N. L., Zhengqui, Z., Miller, M. A., Lerch, J. P., Henkelman, R. M., ... Dolmetsch,  
759 R. E. (2014). Behavioral Abnormalities and Circuit Defects in the Basal Ganglia of a Mouse  
760 Model of 16p11.2 Deletion Syndrome. *Cell Reports*, *7*(4), 1077–1092.  
761 <https://doi.org/10.1016/j.celrep.2014.03.036>
- 762 Postorino, V., Kerns, C. M., Vivanti, G., Bradshaw, J., Siracusano, M., & Mazzone, L. (2017).  
763 Anxiety Disorders and Obsessive-Compulsive Disorder in Individuals with Autism Spectrum  
764 Disorder. *Current Psychiatry Reports*, *19*(12), 92. <https://doi.org/10.1007/s11920-017-0846-y>
- 765 Pucilowska, J., Vithayathil, J., Tavares, E. J., Kelly, C., Karlo, J. C., & Landreth, G. E. (2015).  
766 The 16p11.2 Deletion Mouse Model of Autism Exhibits Altered Cortical Progenitor  
767 Proliferation and Brain Cytoarchitecture Linked to the ERK MAPK Pathway. *The Journal of*  
768 *Neuroscience*, *35*(7), 3190–3200. <https://doi.org/10.1523/jneurosci.4864-13.2015>
- 769 Rein, B., & Yan, Z. (2020). 16p11.2 Copy Number Variations and Neurodevelopmental  
770 Disorders. *Trends in Neurosciences*. <https://doi.org/10.1016/j.tins.2020.09.001>
- 771 Roesch, M. R., Esber, G. R., Li, J., Daw, N. D., & Schoenbaum, G. (2012). Surprise! Neural  
772 correlates of Pearce–Hall and Rescorla–Wagner coexist within the brain. *European Journal of*  
773 *Neuroscience*, *35*(7), 1190–1200. <https://doi.org/10.1111/j.1460-9568.2011.07986.x>
- 774 Rynkiewicz, A., & Łucka, I. (2018). Autism spectrum disorder (ASD) in girls. Co-occurring  
775 psychopathology. Sex differences in clinical manifestation. *Psychiatria Polska*, *52*(4), 629–  
776 639. <https://doi.org/10.12740/pp/onlinefirst/58837>
- 777 Rynkiewicz, A., Schuller, B., Marchi, E., Piana, S., Camurri, A., Lassalle, A., & Baron-Cohen,  
778 S. (2016). An investigation of the ‘female camouflage effect’ in autism using a computerized  
779 ADOS-2 and a test of sex/gender differences. *Molecular Autism*, *7*(1), 10.  
780 <https://doi.org/10.1186/s13229-016-0073-0>
- 781 Sanders, S. J., Ercan-Sencicek, A. G., Hus, V., Luo, R., Murtha, M. T., Moreno-De-Luca, D.,  
782 Chu, S. H., Moreau, M. P., Gupta, A. R., Thomson, S. A., Mason, C. E., Bilguvar, K.,  
783 Celestino-Soper, P. B. S., Choi, M., Crawford, E. L., Davis, L., Davis Wright, N. R.,  
784 Dhodapkar, R. M., DiCola, M., ... State, M. W. (2011). Multiple Recurrent De Novo CNVs,  
785 Including Duplications of the 7q11.23 Williams Syndrome Region, Are Strongly Associated  
786 with Autism. *Neuron*, *70*(5), 863–885. <https://doi.org/10.1016/j.neuron.2011.05.002>
- 787 Schumann, C. M., Hamstra, J., Goodlin-Jones, B. L., Lotspeich, L. J., Kwon, H., Buonocore, M.  
788 H., Lammers, C. R., Reiss, A. L., & Amaral, D. G. (2004). The Amygdala Is Enlarged in

- 789 Children But Not Adolescents with Autism; the Hippocampus Is Enlarged at All Ages. *The*  
790 *Journal of Neuroscience*, 24(28), 6392–6401. <https://doi.org/10.1523/jneurosci.1297-04.2004>
- 791 Schwartz, C. E., & Neri, G. (2012). Autism and intellectual disability: Two sides of the same  
792 coin. *American Journal of Medical Genetics Part C: Seminars in Medical Genetics*, 160C(2),  
793 89–90. <https://doi.org/10.1002/ajmg.c.31329>
- 794 Sebat, J., Lakshmi, B., Malhotra, D., Troge, J., Lese-Martin, C., Walsh, T., Yamrom, B., Yoon,  
795 S., Krasnitz, A., Kendall, J., Leotta, A., Pai, D., Zhang, R., Lee, Y.-H., Hicks, J., Spence, S.  
796 J., Lee, A. T., Puura, K., Lehtimäki, T., ... Wigler, M. (2007). Strong Association of De Novo  
797 Copy Number Mutations with Autism. *Science*, 316(5823), 445–449.  
798 <https://doi.org/10.1126/science.1138659>
- 799 Shackman, A. J., & Fox, A. S. (2016). Contributions of the Central Extended Amygdala to Fear  
800 and Anxiety. *The Journal of Neuroscience*, 36(31), 8050–8063.  
801 <https://doi.org/10.1523/jneurosci.0982-16.2016>
- 802 Shinawi, M., Liu, P., Kang, S.-H. L., Shen, J., Belmont, J. W., Scott, D. A., Probst, F. J.,  
803 Craigen, W. J., Graham, B. H., Pursley, A., Clark, G., Lee, J., Proud, M., Stocco, A.,  
804 Rodriguez, D. L., Kozel, B. A., Sparagana, S., Roeder, E. R., McGrew, S. G., ... Lupski, J. R.  
805 (2010). Recurrent reciprocal 16p11.2 rearrangements associated with global developmental  
806 delay, behavioural problems, dysmorphism, epilepsy, and abnormal head size. *Journal of*  
807 *Medical Genetics*, 47(5), 332. <https://doi.org/10.1136/jmg.2009.073015>
- 808 Solomon, M., Miller, M., Taylor, S. L., Hinshaw, S. P., & Carter, C. S. (2012). Autism  
809 Symptoms and Internalizing Psychopathology in Girls and Boys with Autism Spectrum  
810 Disorders. *Journal of Autism and Developmental Disorders*, 42(1), 48–59.  
811 <https://doi.org/10.1007/s10803-011-1215-z>
- 812 Sparks, B. F., Friedman, S. D., Shaw, D. W., Aylward, E. H., Echelard, D., Artru, A. A.,  
813 Maravilla, K. R., Giedd, J. N., Munson, J., Dawson, G., & Dager, S. R. (2002). Brain  
814 structural abnormalities in young children with autism spectrum disorder. *Neurology*, 59(2),  
815 184–192. <https://doi.org/10.1212/wnl.59.2.184>
- 816 Steinman, K. J., Spence, S. J., Ramocki, M. B., Proud, M. B., Kessler, S. K., Marco, E. J.,  
817 Snyder, L. G., D'Angelo, D., Chen, Q., Chung, W. K., Sherr, E. H., & Consortium, S. V.  
818 (2016). 16p11.2 deletion and duplication: Characterizing neurologic phenotypes in a large  
819 clinically ascertained cohort. *American Journal of Medical Genetics Part A*, 170(11), 2943–  
820 2955. <https://doi.org/10.1002/ajmg.a.37820>
- 821 Szatmari, P., Liu, X., Goldberg, J., Zwaigenbaum, L., Paterson, A. D., Woodbury-Smith, M.,  
822 Georgiades, S., Duku, E., & Thompson, A. (2012). Sex differences in repetitive stereotyped  
823 behaviors in autism: Implications for genetic liability. *American Journal of Medical Genetics*  
824 *Part B: Neuropsychiatric Genetics*, 159B(1), 5–12. <https://doi.org/10.1002/ajmg.b.31238>

- 825 Tian, D., Stoppel, L. J., Heynen, A. J., Lindemann, L., Jaeschke, G., Mills, A. A., & Bear, M. F.  
826 (2015). Contribution of mGluR5 to pathophysiology in a mouse model of human  
827 chromosome 16p11.2 microdeletion. *Nature Neuroscience*, *18*(2), 182–184.  
828 <https://doi.org/10.1038/nn.3911>
- 829 Tolin, D. F., & Foa, E. B. (2006). Sex Differences in Trauma and Posttraumatic Stress Disorder:  
830 A Quantitative Review of 25 Years of Research. *Psychological Bulletin*, *132*(6), 959–992.  
831 <https://doi.org/10.1037/0033-2909.132.6.959>
- 832 Tonnsen, B. L., Boan, A. D., Bradley, C. C., Charles, J., Cohen, A., & Carpenter, L. A. (2016).  
833 Prevalence of Autism Spectrum Disorders Among Children With Intellectual Disability.  
834 *American Journal on Intellectual and Developmental Disabilities*, *121*(6), 487–500.  
835 <https://doi.org/10.1352/1944-7558-121.6.487>
- 836 Tovote, P., Fadok, J. P., & Lüthi, A. (2015). Neuronal circuits for fear and anxiety. *Nature*  
837 *Reviews Neuroscience*, *16*(6), 317–331. <https://doi.org/10.1038/nrn3945>
- 838 Varodayan, F. P., Khom, S., Patel, R. R., Steinman, M. Q., Hedges, D. M., Oleata, C. S.,  
839 Homanics, G. E., Roberto, M., & Bajo, M. (2018). Role of TLR4 in the Modulation of  
840 Central Amygdala GABA Transmission by CRF Following Restraint Stress. *Alcohol and*  
841 *Alcoholism*, *53*(6), 642–649. <https://doi.org/10.1093/alcalc/agx114>
- 842 Varodayan, F. P., Minnig, M. A., Steinman, M. S., Oleata, C. S., Riley, M. W., Sabino, V., &  
843 Roberto, M. (2019). PACAP regulation of central amygdala GABAergic synapses is altered  
844 by restraint stress. *Neuropharmacology*, 107752.  
845 <https://doi.org/10.1016/j.neuropharm.2019.107752>
- 846 Wager, D., T., Barrett, F., L., Bliss-Moreau, E., Lindquist, A., K., Duncan, S., Kober, H., Joseph,  
847 J., Davidson, M., Mize, &, & J. (2008). *The neuroimaging of emotion*. In M. Lewis, J. M.  
848 *Haviland-Jones, & L. F. Barrett (Eds.), Handbook of emotions*. The Guilford Press.
- 849 Walker, D. L., & Davis, M. (2008). Role of the extended amygdala in short-duration versus  
850 sustained fear: a tribute to Dr. Lennart Heimer. *Brain Structure and Function*, *213*(1–2), 29–  
851 42. <https://doi.org/10.1007/s00429-008-0183-3>
- 852 Walsh, J. J., Christoffel, D. J., Heifets, B. D., Ben-Dor, G. A., Selimbeyoglu, A., Hung, L. W.,  
853 Deisseroth, K., & Malenka, R. C. (2018). 5-HT release in nucleus accumbens rescues social  
854 deficits in mouse autism model. *Nature*, *560*(7720), 589–594. [https://doi.org/10.1038/s41586-](https://doi.org/10.1038/s41586-018-0416-4)  
855 [018-0416-4](https://doi.org/10.1038/s41586-018-0416-4)
- 856 Weiss, L. A., Shen, Y., Korn, J. M., Arking, D. E., Miller, D. T., Fossdal, R., Saemundsen, E.,  
857 Stefansson, H., Ferreira, M. A. R., Green, T., Platt, O. S., Ruderfer, D. M., Walsh, C. A.,  
858 Altshuler, D., Chakravarti, A., Tanzi, R. E., Stefansson, K., Santangelo, S. L., Gusella, J. F.,  
859 ... Consortium, A. (2008). Association between Microdeletion and Microduplication at  
860 16p11.2 and Autism. *The New England Journal of Medicine*, *358*(7), 667–675.  
861 <https://doi.org/10.1056/nejmoa075974>



- 862 Werling, D. M., & Geschwind, D. H. (2013). Sex differences in autism spectrum disorders.  
863 *Current Opinion in Neurology*, 26(2), 146–153.  
864 <https://doi.org/10.1097/wco.0b013e32835ee548>
- 865 White, S. W., Oswald, D., Ollendick, T., & Scahill, L. (2009). Anxiety in children and  
866 adolescents with autism spectrum disorders. *Clinical Psychology Review*, 29(3), 216–229.  
867 <https://doi.org/10.1016/j.cpr.2009.01.003>
- 868 Yang, M., Lewis, F. C., Sarvi, M. S., Foley, G. M., & Crawley, J. N. (2015). 16p11.2 Deletion  
869 mice display cognitive deficits in touchscreen learning and novelty recognition tasks.  
870 *Learning & Memory*, 22(12), 622–632. <https://doi.org/10.1101/lm.039602.115>
- 871 Yang, M., Mahrt, E. J., Lewis, F., Foley, G., Portmann, T., Dolmetsch, R. E., Portfors, C. V., &  
872 Crawley, J. N. (2015). 16p11.2 Deletion Syndrome Mice Display Sensory and Ultrasonic  
873 Vocalization Deficits During Social Interactions. *Autism Research*, 8(5), 507–521.  
874 <https://doi.org/10.1002/aur.1465>
- 875 Yu, K., Ahrens, S., Zhang, X., Schiff, H., Ramakrishnan, C., Fenno, L., Deisseroth, K., Zhao, F.,  
876 Luo, M.-H., Gong, L., He, M., Zhou, P., Paninski, L., & Li, B. (2017). The central amygdala  
877 controls learning in the lateral amygdala. *Nature Neuroscience*, 20(12), 1680–1685.  
878 <https://doi.org/10.1038/s41593-017-0009-9>
- 879 Yu, K., Silva, P. G. da, Albeanu, D. F., & Li, B. (2016). Central Amygdala Somatostatin  
880 Neurons Gate Passive and Active Defensive Behaviors. *The Journal of Neuroscience*, 36(24),  
881 6488–6496. <https://doi.org/10.1523/jneurosci.4419-15.2016>
- 882 Zimprich, A., Garrett, L., Deussing, J. M., Wotjak, C. T., Fuchs, H., Gailus-Durner, V., Angelis,  
883 M. H. de, Wurst, W., & Höflter, S. M. (2014). A robust and reliable non-invasive test for stress  
884 responsivity in mice. *Frontiers in Behavioral Neuroscience*, 8, 125.  
885 <https://doi.org/10.3389/fnbeh.2014.00125>
- 886 Zufferey, F., Sherr, E. H., Beckmann, N. D., Hanson, E., Maillard, A. M., Hippolyte, L., Macé,  
887 A., Ferrari, C., Kutalik, Z., Andrieux, J., Aylward, E., Barker, M., Bernier, R., Bouquillon, S.,  
888 Conus, P., Delobel, B., Faucett, W. A., Goin-Kochel, R. P., Grant, E., ... Consortium, 16p11  
889 2 European. (2012). A 600 kb deletion syndrome at 16p11.2 leads to energy imbalance and  
890 neuropsychiatric disorders. *Journal of Medical Genetics*, 49(10), 660.  
891 <https://doi.org/10.1136/jmedgenet-2012-101203>
- 892

1 **Sex-specific stress-related behavioral phenotypes and central amygdala dysfunction in a**  
2 **mouse model of 16p11.2 microdeletion**

3 Jacqueline Giovanniello<sup>1,2,3</sup>, Sandra Ahrens<sup>2,4</sup>, Kai Yu<sup>2</sup>, Bo Li<sup>1,2</sup>#

4

5

6 **FIGURES AND FIGURE LEGENDS**

7

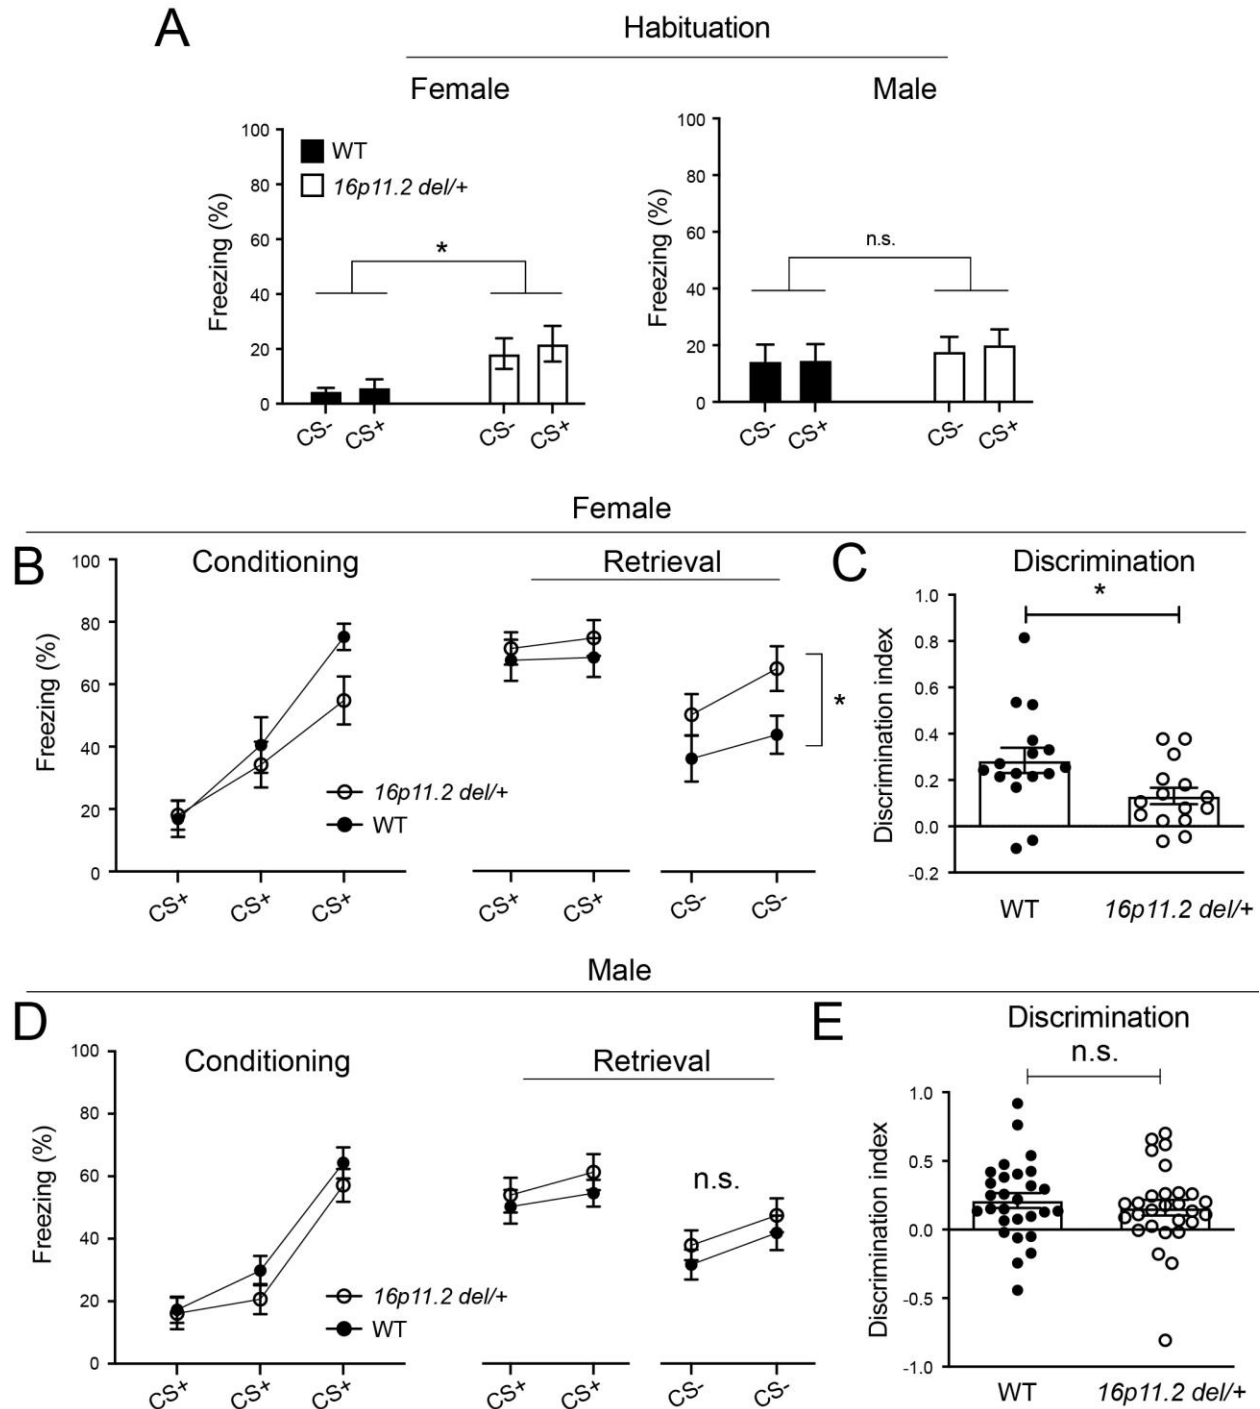

8

9 **Figure 1. Female *16p11.2 del/+* mice exhibit fear generalization following fear conditioning**

10 (A) Freezing behavior of male and female *16p11.2 del/+* mice and their respective wildtype (WT)  
 11 littermates in response to CS+ and CS- during habituation (female *16p11.2 del/+*, n = 15  
 12 mice, WT, n = 16),  $F(1, 29) = 6.023$ ,  $P = 0.0204$ ; male (*16p11.2 del/+*, n = 28 mice, WT, n =  
 13 28),  $F(1, 54) = 0.3433$ ,  $P = 0.5604$ ; \* $P < 0.05$ , n.s., nonsignificant; two-way ANOVA with  
 14 repeated measures).

- 15 (B) Freezing to each stimulus presentation during conditioning and retrieval for female mice  
16 (conditioning,  $F(1,29) = 1.419$ ,  $P = 0.2432$ ; CS+ retrieval,  $F(1,29) = 0.4314$ ,  $P = 0.5165$ ; CS-  
17 retrieval,  $F(1,29) = 5.765$ ,  $P = 0.0230$ ; \* $p < 0.05$ ; two-way ANOVA with repeated measures  
18 and post-hoc Sidak's test).
- 19 (C) Discrimination index  $[(CS^+ - CS^-) / (CS^+ + CS^-)]$  for female mice (\* $P = 0.0192$ , Mann-  
20 Whitney t-test,).
- 21 (D) Freezing to each stimulus presentation during conditioning and retrieval for male mice.  
22 (conditioning,  $F(1,54) = 0.9938$ ,  $P = 0.3233$ ; CS+ retrieval,  $F(1,54) = 0.6327$ ,  $P = 0.4298$ ; CS-  
23 retrieval,  $F(1,54) = 0.8779$ ,  $P = 0.3530$ ; two-way ANOVA with repeated measures).
- 24 (E) Discrimination index for male mice ( $P = 0.3742$ , n.s., nonsignificant, Mann-Whitney t-test).  
25
- 26 Data are presented as mean  $\pm$  s.e.m.

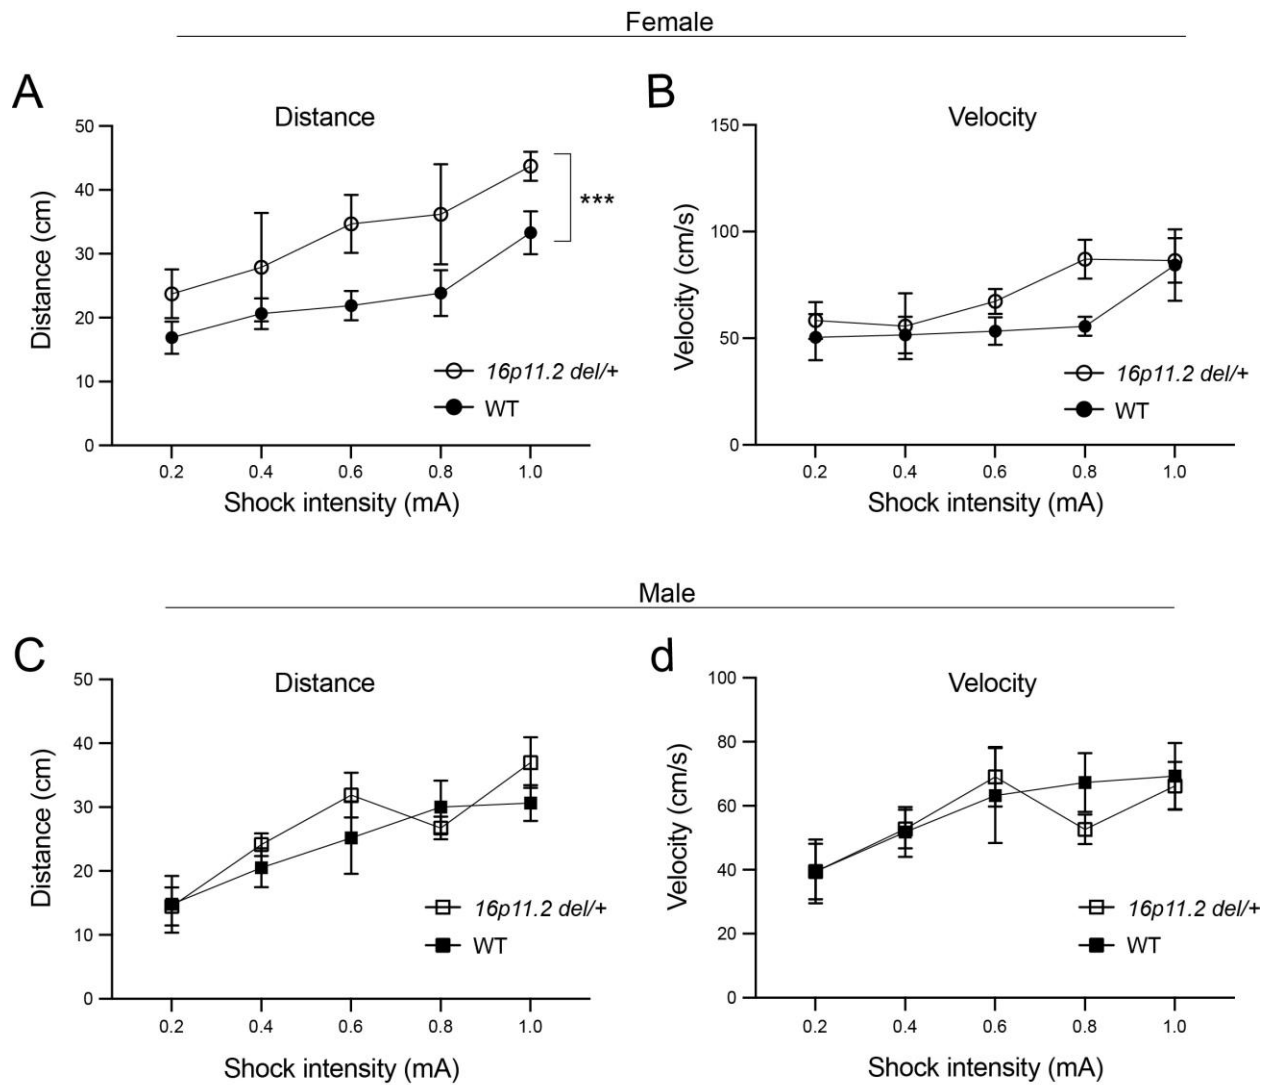

27

28 **Figure 2. Female *16p11.2 del/+* mice show enhanced reactivity to foot shock**

29 (A) Distance traveled during 2-s shock presentations for female mice ( $F(1,50) = 14.94$ ,  $P =$   
30  $0.0003$ ;  $***P < 0.001$ ; two-way ANOVA; *16p11.2 del/+*,  $n = 4$ ; WT,  $n = 8$ ).

31 (B) Movement velocity during 2-s shock presentations for female mice ( $F(1,50) = 2.596$ ,  $P =$   
32  $0.1135$ ; two-way ANOVA).

33 (C) Distance traveled during 2-s shock presentations for male mice ( $F(1,50) = 1.410$ ,  $P = 0.2407$ ;  
34 two-way ANOVA; *16p11.2 del/+*,  $n = 7$ ; WT,  $n = 5$ ).

35 (D) Movement velocity during 2-s shock presentations for male mice ( $F(1,50) = 0.1467$ ,  $P =$   
36  $0.7033$ ; two-way ANOVA).

37

38 Data are presented as mean  $\pm$  s.e.m.

39

40

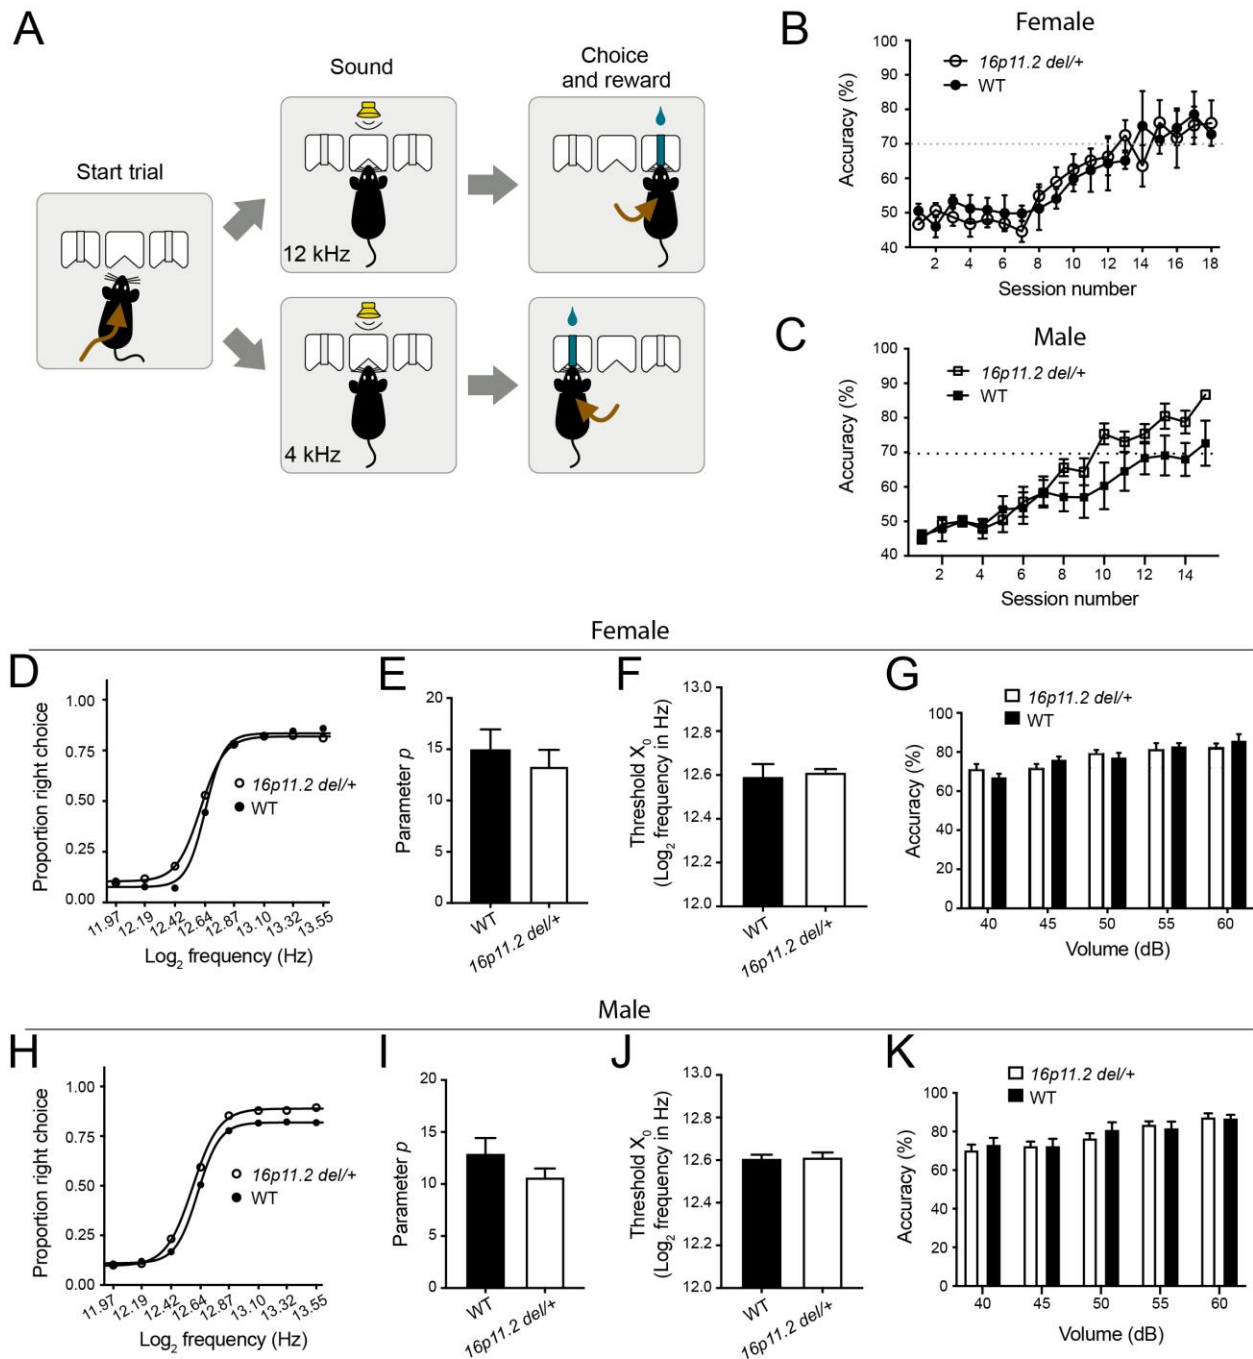

41  
42 **Figure 3. *16p11.2 del/+* mice have normal auditory perception**

43 (A) A schematic of the behavioral task.

44 (B) Performance levels across training for female mice ( $F(1,8) = 0.005112$ ,  $P = 0.9448$ ; two-way  
45 ANOVA; *16p11.2 del/+*,  $n = 7$ , WT,  $n = 3$ ).

46 (C) Performance levels across training for male mice ( $F(1,14) = 2.557$ ,  $P = 0.1321$ ; two-way  
47 ANOVA; *16p11.2 del/+*,  $n = 9$ ; WT,  $n = 7$ ).

48 (D) Psychometric response curve for frequencies between 4 and 12 kHz (in  $\text{Log}_2$  values) for  
49 female mice.

- 50 (E) Quantification of the slope of the psychometric curve (parameter  $p$ ) for female mice ( $P =$   
51  $0.5878$ , t-test).
- 52 (F) Quantification of the median threshold,  $X_0$ , from the psychometric function for female mice  
53 ( $P = 0.6465$ , t-test).
- 54 (G) Average performance levels at 4 and 12 kHz for stimuli volume between 40 and 60 dB for  
55 female mice ( $F(1,8) = 0.04474$ ,  $P = 0.8378$ ; two-way ANOVA with repeated measures).
- 56 (H) Psychometric response curve for frequencies between 4 and 12 kHz (in  $\text{Log}_2$  values) for male  
57 mice.
- 58 (I) Quantification of the slope of the psychometric curve (parameter  $p$ ) for male mice ( $P =$   
59  $0.1713$ , t-test).
- 60 (J) Quantification of the median threshold,  $X_0$ , from the psychometric function for male mice ( $P$   
61  $= 0.8607$ , t-test).
- 62 (K) Average performance levels at 4 and 12 kHz for stimuli volume between 40 and 60 dB for  
63 male mice ( $F(1,14) = 0.0173$ ,  $P = 0.8972$ ; two-way ANOVA with repeated measures).
- 64
- 65 All data are presented as mean  $\pm$  s.e.m.

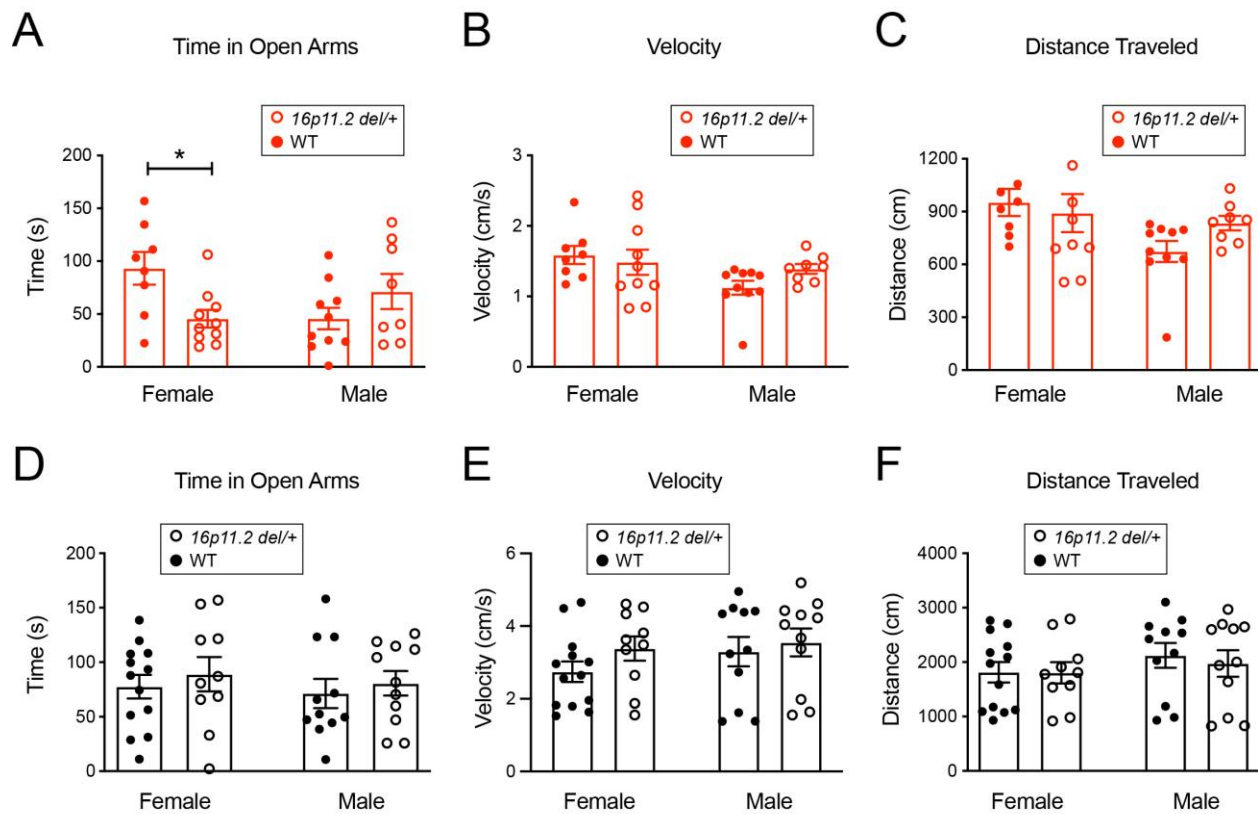

66  
67 **Figure 4. Female *16p11.2 del/+* mice exhibit enhanced stress-induced anxiety-like behavior**

68 (A) Time spent in the open arms of EPM 24 hours after stress exposure ( $F(1,32) = 8.553$ ,  $P =$   
69  $0.0063$ ; \* $P < 0.05$ ; two-way ANOVA with post-hoc Sidak's test; female *16p11.2 del/+*,  $n =$   
70  $10$ , female WT,  $n = 8$ , male *16p11.2 del/+*,  $n = 8$ , male WT,  $n = 10$ ).  
71 (B) Movement velocity on the EPM 24 hours after stress exposure ( $F(1,32) = 0.3917$ ,  $P = 0.5358$ ;  
72 two-way ANOVA). Same mice as in A are used.  
73 (C) Distance traveled on the EPM 24 hours after stress exposure ( $F(1,32) = 0.3918$ ,  $P = 0.5358$ ;  
74 two-way ANOVA). Same mice as in A are used.  
75 (D) Time spent in the open arms of EPM in naïve mice ( $F(1,41) = 0.6545$ ,  $P = 0.4232$ ; two-way  
76 ANOVA; female *16p11.2 del/+*,  $n = 10$ , female WT,  $n = 13$ , male *16p11.2 del/+*,  $n = 11$ ;  
77 male WT,  $n = 11$ ).  
78 (E) Movement velocity on the EPM in naïve mice ( $F(1,41) = 1.587$ ,  $P = 0.2148$ ; two-way  
79 ANOVA). Same mice as in D are used.  
80 (F) Distance traveled on the EPM in naïve mice ( $F(1,41) = 0.1314$ ,  $P = 0.7189$ ; two-way  
81 ANOVA). Same mice as in D are used.

82  
83 Data are presented as mean  $\pm$  s.e.m.

84



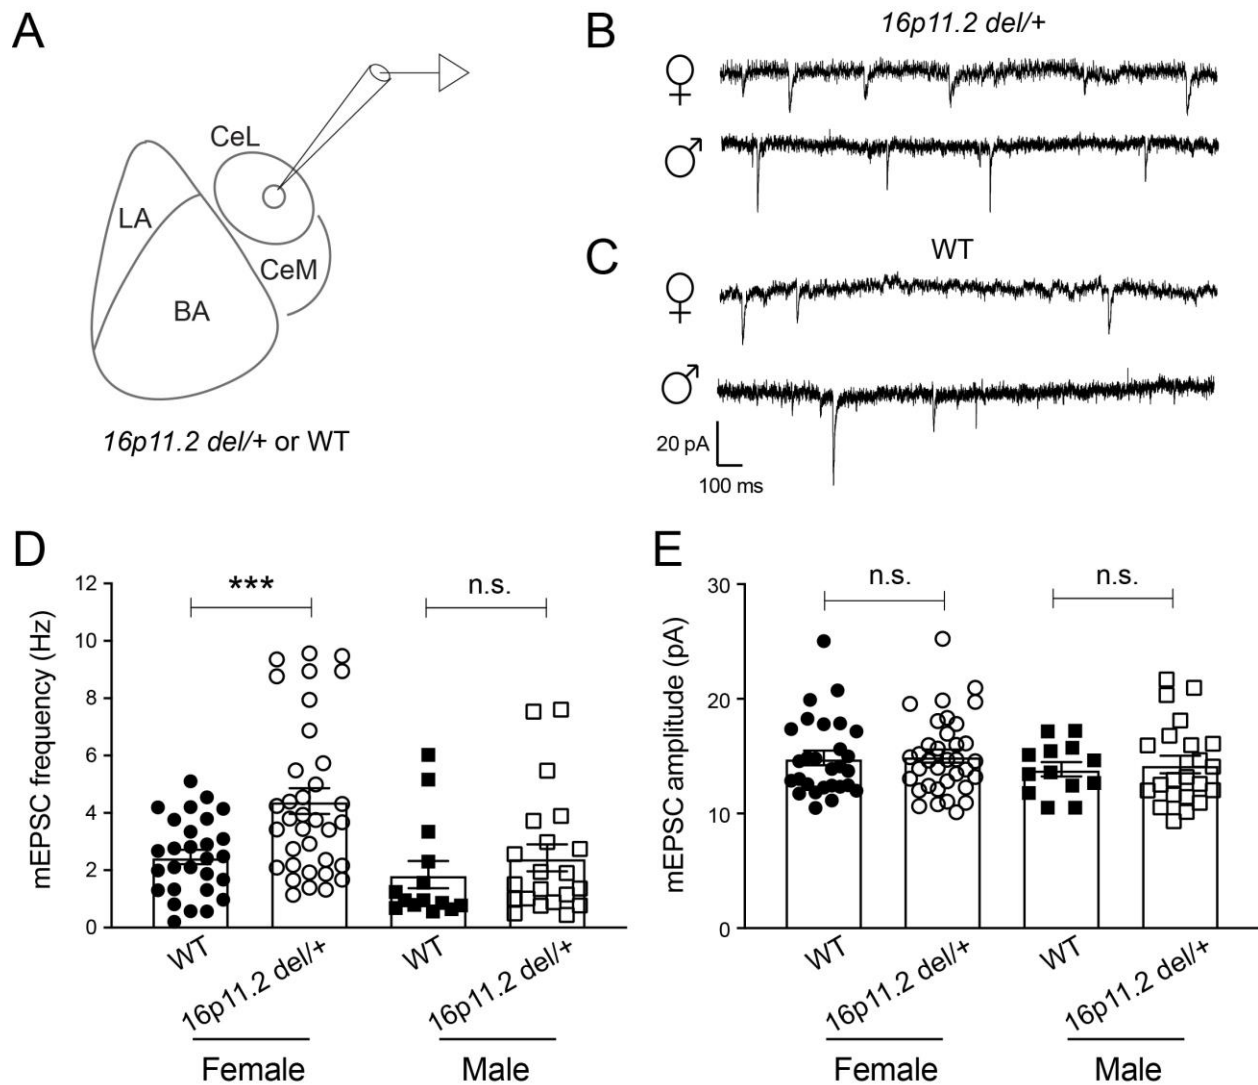

85  
86 **Figure 5. Female *16p11.2 del/+* mice have increased excitatory synaptic transmission onto**  
87 **CeA neurons**

88 (A) A schematic of the experimental design.

89 (B, C) Representative mEPSC traces from CeA neurons recorded from male and female *16p11.2 del/+*  
90 *del/+* (B) and WT (C) mice.

91 (D) Quantification of mEPSC frequency for CeA neurons ( $F(1, 94) = 7.759$ ,  $P = 0.0065$ ;  $***P <$   
92  $0.001$ ; two-way ANOVA with post-hoc Sidak's test; female *16p11.2 del/+*,  $n = 35$  cells from 4  
93 mice, female WT,  $n = 28$  cells from 3 mice, male *16p11.2 del/+*,  $n = 21$  cells from 4 mice, male  
94 WT,  $n = 14$  cells from 3 mice).

95 (E) Quantification of mEPSC amplitude for CeA neurons ( $F(1,94) = 0.1620$ ,  $P = 0.6882$ ; two-  
96 way ANOVA). Data are from the same cells as in D.

97

98 Data are presented as mean  $\pm$  s.e.m.

99

100

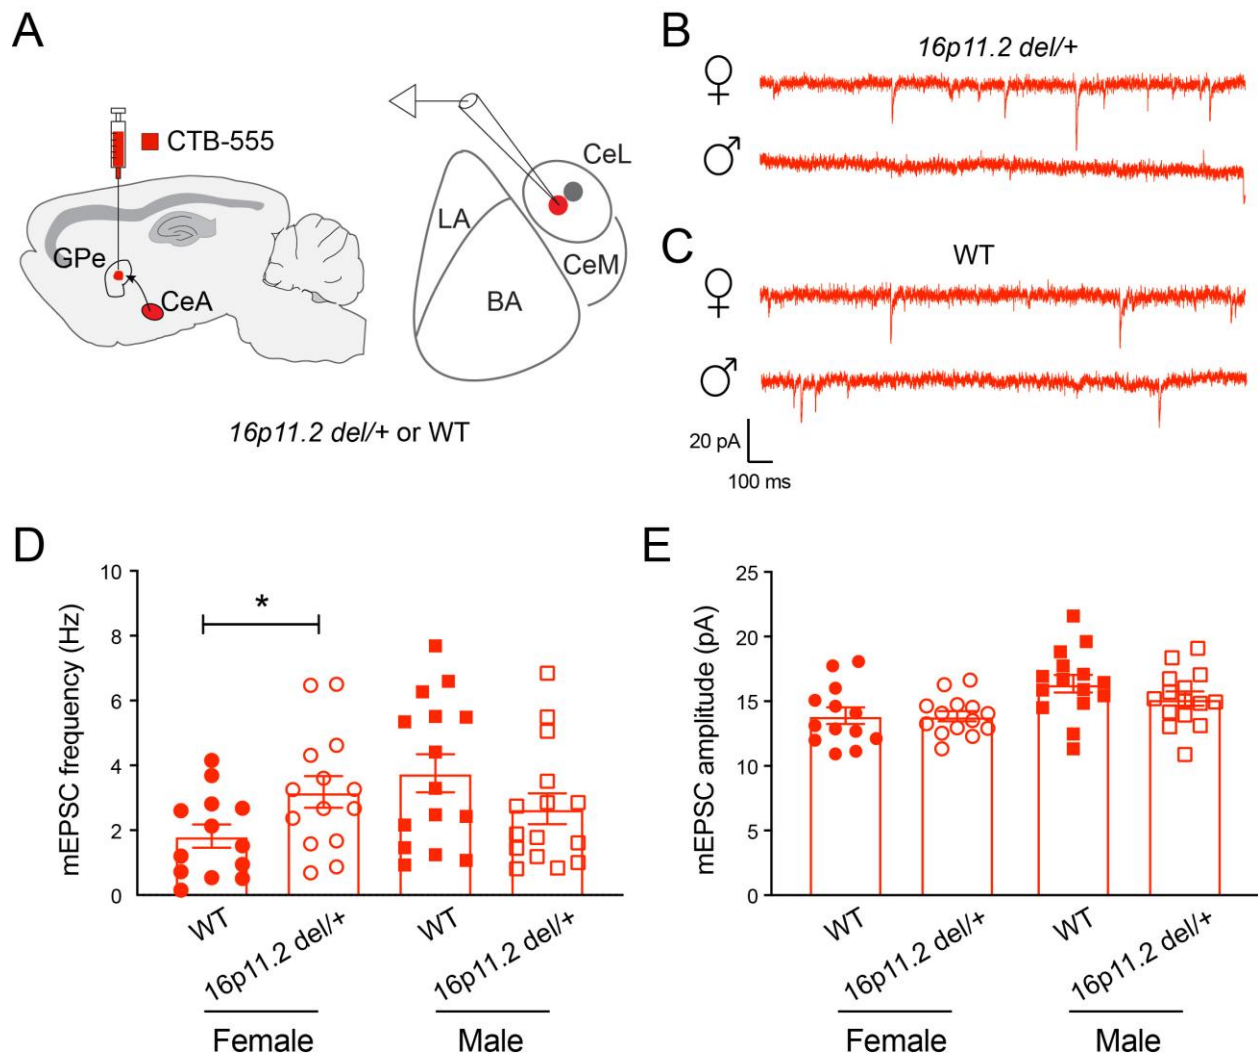

101  
102 **Figure 6. Female *16p11.2 del/+* mice have increased excitatory synaptic transmission onto**  
103 **GPe-projecting CeA neurons**  
104 (A) A schematic of the experimental design. CTB-555 was used to retrogradely label GPe-  
105 projecting CeA neurons.  
106 (B, C) Representative mEPSC traces from GPe-projecting CeA neurons recorded from male and  
107 female *16p11.2 del/+* (B) and WT (C) mice.  
108 (D) Quantification of mEPSC frequency for GPe-projecting CeA neurons ( $F(1, 53) = 6.251$ ,  $P =$   
109  $0.0155$ ;  $*P < 0.05$ ; two-way ANOVA with post-hoc Sidak's test; female *16p11.2 del/+*,  $n = 14$   
110 cells from 5 mice, female WT,  $n = 13$  cells from 7 mice, male *16p11.2 del/+*,  $n = 15$  cells from 3  
111 mice, male WT,  $n = 15$  cells from 5 mice).  
112 (E) Quantification of mEPSC amplitude for GPe-projecting CeA neurons ( $F(1,53) = 1.055$ ,  $P =$   
113  $0.3090$ ; two-way ANOVA). Data are from the same cells as in D.  
114  
115 Data are presented as mean  $\pm$  s.e.m.
